# Supplementary material for: Bird protection treatments reduce bird-window collision risk at low-rise buildings within a Pacific coastal protected area
Source: PeerJ. 2022 Mar 22;10:e13142. doi: 10.7717/peerj.13142 (PMC8953498; doi:10.7717/peerj.13142)
Supplement: Supplemental Information 4 [file peerj-10-13142-s004.xlsx]

## Sheet: ReadME
recID	Building survey of all monitored facades at the Science complex or Annex
survey.ID	Survey identifier where a complete survey involved paired building surveys at the Science complex and Annex
full.date	Date of the survey
year	Year of the survey
obsID	observer ID that conducted the survey
mort	number of dead birds found during survey
stun	number of dead birds found during survey
coll.count	summed mortalities or stunned birds detected during building survey
window.area	window area (m2)
sps	If a collision mortality was detected, the species that was found using the AOU 4-digit identifier or UNID
age	If a collision mortality was detected, the age of the bird: UK(Unknown), AHY (After hatch year), HY (Hatch year), SY (Second year), ASY (After second year), Juv (Juvenile), NA (not applicable, no collision found)
collision.building.side	If a collision mortality was detected, which façade of the building the collision occurred (facades depicted in Figure 1); b1 is the science complex and b2 is the Annex
building	Building of survey - Science Complex or Annex
treat.grp	The treatment of the building: FF-pre (conventional glass at Science Complex 2013-2015), FF-post (FF-treated glass at Science Complex 2016-2018), Ornilux-Pre (Ornilux 2013-2015) and Ornilux (2016-2018)
season	Season of survey - Spring, Summer, Fall, Winter (defined in methods)

## Sheet: data
recID	survey.ID	full.date	year	obsID	mort	stun	coll.count	window.area	sps	age	collision.building.side	building	treat.grp	season
19	10	2013-04-03	2013	4	0	0	0	110.5	NA	NA	NA	ScienceComplex	Conventional 2013-2015	Spring
20	10	2013-04-03	2013	4	0	0	0	35.1	NA	NA	NA	Annex	Ornilux 2013-2015	Spring
21	11	2013-04-04	2013	4	0	0	0	110.5	NA	NA	NA	ScienceComplex	Conventional 2013-2015	Spring
22	11	2013-04-04	2013	4	0	0	0	35.1	NA	NA	NA	Annex	Ornilux 2013-2015	Spring
23	12	2013-04-08	2013	1	0	0	0	110.5	NA	NA	NA	ScienceComplex	Conventional 2013-2015	Spring
24	12	2013-04-08	2013	1	0	0	0	35.1	NA	NA	NA	Annex	Ornilux 2013-2015	Spring
25	13	2013-04-09	2013	4	0	0	0	110.5	NA	NA	NA	ScienceComplex	Conventional 2013-2015	Spring
26	13	2013-04-09	2013	4	0	0	0	35.1	NA	NA	NA	Annex	Ornilux 2013-2015	Spring
27	14	2013-04-10	2013	7	0	0	0	110.5	NA	NA	NA	ScienceComplex	Conventional 2013-2015	Spring
28	14	2013-04-10	2013	7	0	0	0	35.1	NA	NA	NA	Annex	Ornilux 2013-2015	Spring
29	15	2013-04-11	2013	8	0	0	0	110.5	NA	NA	NA	ScienceComplex	Conventional 2013-2015	Spring
30	15	2013-04-11	2013	8	0	0	0	35.1	NA	NA	NA	Annex	Ornilux 2013-2015	Spring
31	16	2013-04-12	2013	8	0	0	0	110.5	NA	NA	NA	ScienceComplex	Conventional 2013-2015	Spring
32	16	2013-04-12	2013	8	0	0	0	35.1	NA	NA	NA	Annex	Ornilux 2013-2015	Spring
33	17	2013-04-15	2013	1	0	0	0	110.5	NA	NA	NA	ScienceComplex	Conventional 2013-2015	Spring
34	17	2013-04-15	2013	1	0	0	0	35.1	NA	NA	NA	Annex	Ornilux 2013-2015	Spring
35	18	2013-04-16	2013	4	0	2	2	110.5	UNID	UK	b1.5	ScienceComplex	Conventional 2013-2015	Spring
36	18	2013-04-16	2013	4	0	0	0	35.1	NA	NA	NA	Annex	Ornilux 2013-2015	Spring
37	19	2013-04-17	2013	9	0	0	0	110.5	NA	NA	NA	ScienceComplex	Conventional 2013-2015	Spring
38	19	2013-04-17	2013	9	0	0	0	35.1	NA	NA	NA	Annex	Ornilux 2013-2015	Spring
39	20	2013-04-18	2013	10	0	0	0	110.5	NA	NA	NA	ScienceComplex	Conventional 2013-2015	Spring
40	20	2013-04-18	2013	10	0	0	0	35.1	NA	NA	NA	Annex	Ornilux 2013-2015	Spring
41	21	2013-04-19	2013	10	0	0	0	110.5	NA	NA	NA	ScienceComplex	Conventional 2013-2015	Spring
42	21	2013-04-19	2013	10	0	0	0	35.1	NA	NA	NA	Annex	Ornilux 2013-2015	Spring
43	22	2013-04-22	2013	11	0	0	0	110.5	NA	NA	NA	ScienceComplex	Conventional 2013-2015	Spring
44	22	2013-04-22	2013	11	0	0	0	35.1	NA	NA	NA	Annex	Ornilux 2013-2015	Spring
45	23	2013-04-23	2013	8	0	0	0	110.5	NA	NA	NA	ScienceComplex	Conventional 2013-2015	Spring
46	23	2013-04-23	2013	8	0	0	0	35.1	NA	NA	NA	Annex	Ornilux 2013-2015	Spring
47	24	2013-04-24	2013	12	0	0	0	110.5	NA	NA	NA	ScienceComplex	Conventional 2013-2015	Spring
48	24	2013-04-24	2013	12	0	0	0	35.1	NA	NA	NA	Annex	Ornilux 2013-2015	Spring
49	25	2013-04-25	2013	4	0	0	0	110.5	NA	NA	NA	ScienceComplex	Conventional 2013-2015	Spring
50	25	2013-04-25	2013	4	0	0	0	35.1	NA	NA	NA	Annex	Ornilux 2013-2015	Spring
1	1	2013-04-29	2013	1	1	0	1	110.5	GCSP	AHY	b1.5	ScienceComplex	Conventional 2013-2015	Spring
2	1	2013-04-29	2013	1	0	0	0	35.1	NA	NA	NA	Annex	Ornilux 2013-2015	Spring
51	26	2013-05-01	2013	8	0	1	1	110.5	UNID	UK	b1.5	ScienceComplex	Conventional 2013-2015	Spring
52	26	2013-05-01	2013	8	0	0	0	35.1	NA	NA	NA	Annex	Ornilux 2013-2015	Spring
53	27	2013-05-02	2013	13	0	0	0	110.5	NA	NA	NA	ScienceComplex	Conventional 2013-2015	Spring
54	27	2013-05-02	2013	13	0	0	0	35.1	NA	NA	NA	Annex	Ornilux 2013-2015	Spring
55	28	2013-05-04	2013	14	0	1	1	110.5	UNID	UK	b1.6	ScienceComplex	Conventional 2013-2015	Spring
56	28	2013-05-04	2013	14	0	0	0	35.1	NA	NA	NA	Annex	Ornilux 2013-2015	Spring
57	29	2013-05-06	2013	8	0	0	0	110.5	NA	NA	NA	ScienceComplex	Conventional 2013-2015	Spring
58	29	2013-05-06	2013	8	0	0	0	35.1	NA	NA	NA	Annex	Ornilux 2013-2015	Spring
59	30	2013-05-07	2013	4	0	0	0	110.5	NA	NA	NA	ScienceComplex	Conventional 2013-2015	Spring
60	30	2013-05-07	2013	4	0	0	0	35.1	NA	NA	NA	Annex	Ornilux 2013-2015	Spring
61	31	2013-05-08	2013	15	0	0	0	110.5	NA	NA	NA	ScienceComplex	Conventional 2013-2015	Spring
62	31	2013-05-08	2013	15	0	0	0	35.1	NA	NA	NA	Annex	Ornilux 2013-2015	Spring
63	32	2013-05-09	2013	4	0	0	0	110.5	NA	NA	NA	ScienceComplex	Conventional 2013-2015	Spring
64	32	2013-05-09	2013	4	0	0	0	35.1	NA	NA	NA	Annex	Ornilux 2013-2015	Spring
65	33	2013-05-10	2013	9	0	0	0	110.5	NA	NA	NA	ScienceComplex	Conventional 2013-2015	Spring
66	33	2013-05-10	2013	9	0	0	0	35.1	NA	NA	NA	Annex	Ornilux 2013-2015	Spring
67	34	2013-05-13	2013	7	0	0	0	110.5	NA	NA	NA	ScienceComplex	Conventional 2013-2015	Spring
68	34	2013-05-13	2013	7	0	0	0	35.1	NA	NA	NA	Annex	Ornilux 2013-2015	Spring
69	35	2013-05-14	2013	4	0	0	0	110.5	NA	NA	NA	ScienceComplex	Conventional 2013-2015	Spring
70	35	2013-05-14	2013	4	0	0	0	35.1	NA	NA	NA	Annex	Ornilux 2013-2015	Spring
71	36	2013-05-15	2013	8	0	0	0	110.5	NA	NA	NA	ScienceComplex	Conventional 2013-2015	Spring
72	36	2013-05-15	2013	8	0	0	0	35.1	NA	NA	NA	Annex	Ornilux 2013-2015	Spring
73	37	2013-05-17	2013	8	0	0	0	110.5	NA	NA	NA	ScienceComplex	Conventional 2013-2015	Spring
74	37	2013-05-17	2013	8	0	0	0	35.1	NA	NA	NA	Annex	Ornilux 2013-2015	Spring
75	38	2013-05-21	2013	4	0	0	0	110.5	NA	NA	NA	ScienceComplex	Conventional 2013-2015	Spring
76	38	2013-05-21	2013	4	0	0	0	35.1	NA	NA	NA	Annex	Ornilux 2013-2015	Spring
77	39	2013-05-22	2013	7	0	0	0	110.5	NA	NA	NA	ScienceComplex	Conventional 2013-2015	Spring
78	39	2013-05-22	2013	7	0	0	0	35.1	NA	NA	NA	Annex	Ornilux 2013-2015	Spring
79	40	2013-05-23	2013	16	0	0	0	110.5	NA	NA	NA	ScienceComplex	Conventional 2013-2015	Spring
80	40	2013-05-23	2013	16	0	0	0	35.1	NA	NA	NA	Annex	Ornilux 2013-2015	Spring
81	41	2013-05-24	2013	8	0	0	0	110.5	NA	NA	NA	ScienceComplex	Conventional 2013-2015	Spring
82	41	2013-05-24	2013	8	0	0	0	35.1	NA	NA	NA	Annex	Ornilux 2013-2015	Spring
83	42	2013-05-27	2013	16	0	0	0	110.5	NA	NA	NA	ScienceComplex	Conventional 2013-2015	Spring
84	42	2013-05-27	2013	16	0	0	0	35.1	NA	NA	NA	Annex	Ornilux 2013-2015	Spring
85	43	2013-05-28	2013	4	0	0	0	110.5	NA	NA	NA	ScienceComplex	Conventional 2013-2015	Spring
86	43	2013-05-28	2013	4	0	0	0	35.1	NA	NA	NA	Annex	Ornilux 2013-2015	Spring
87	44	2013-05-29	2013	16	0	0	0	110.5	NA	NA	NA	ScienceComplex	Conventional 2013-2015	Spring
88	44	2013-05-29	2013	16	0	0	0	35.1	NA	NA	NA	Annex	Ornilux 2013-2015	Spring
89	45	2013-05-30	2013	16	0	0	0	110.5	NA	NA	NA	ScienceComplex	Conventional 2013-2015	Spring
90	45	2013-05-30	2013	16	0	0	0	35.1	NA	NA	NA	Annex	Ornilux 2013-2015	Spring
91	46	2013-06-03	2013	8	0	0	0	110.5	NA	NA	NA	ScienceComplex	Conventional 2013-2015	Summer
92	46	2013-06-03	2013	8	0	0	0	35.1	NA	NA	NA	Annex	Ornilux 2013-2015	Summer
93	47	2013-06-04	2013	8	0	0	0	110.5	NA	NA	NA	ScienceComplex	Conventional 2013-2015	Summer
94	47	2013-06-04	2013	8	0	0	0	35.1	NA	NA	NA	Annex	Ornilux 2013-2015	Summer
95	48	2013-06-07	2013	8	0	0	0	110.5	NA	NA	NA	ScienceComplex	Conventional 2013-2015	Summer
96	48	2013-06-07	2013	8	0	0	0	35.1	NA	NA	NA	Annex	Ornilux 2013-2015	Summer
97	49	2013-06-10	2013	2	0	0	0	110.5	NA	NA	NA	ScienceComplex	Conventional 2013-2015	Summer
98	49	2013-06-10	2013	2	0	0	0	35.1	NA	NA	NA	Annex	Ornilux 2013-2015	Summer
99	50	2013-06-11	2013	2	0	0	0	110.5	NA	NA	NA	ScienceComplex	Conventional 2013-2015	Summer
100	50	2013-06-11	2013	2	0	0	0	35.1	NA	NA	NA	Annex	Ornilux 2013-2015	Summer
101	51	2013-06-12	2013	2	0	0	0	110.5	NA	NA	NA	ScienceComplex	Conventional 2013-2015	Summer
102	51	2013-06-12	2013	2	0	0	0	35.1	NA	NA	NA	Annex	Ornilux 2013-2015	Summer
103	52	2013-06-13	2013	2	0	0	0	110.5	NA	NA	NA	ScienceComplex	Conventional 2013-2015	Summer
104	52	2013-06-13	2013	2	0	0	0	35.1	NA	NA	NA	Annex	Ornilux 2013-2015	Summer
105	53	2013-06-14	2013	2	0	0	0	110.5	NA	NA	NA	ScienceComplex	Conventional 2013-2015	Summer
106	53	2013-06-14	2013	2	0	0	0	35.1	NA	NA	NA	Annex	Ornilux 2013-2015	Summer
3	2	2013-06-17	2013	2	1	0	1	110.5	BARS	AHY	b1.8	ScienceComplex	Conventional 2013-2015	Summer
4	2	2013-06-17	2013	2	0	0	0	35.1	NA	NA	NA	Annex	Ornilux 2013-2015	Summer
107	54	2013-06-18	2013	2	0	0	0	110.5	NA	NA	NA	ScienceComplex	Conventional 2013-2015	Summer
108	54	2013-06-18	2013	2	0	0	0	35.1	NA	NA	NA	Annex	Ornilux 2013-2015	Summer
109	55	2013-06-19	2013	2	0	0	0	110.5	NA	NA	NA	ScienceComplex	Conventional 2013-2015	Summer
110	55	2013-06-19	2013	2	0	0	0	35.1	NA	NA	NA	Annex	Ornilux 2013-2015	Summer
111	56	2013-06-20	2013	2	0	0	0	110.5	NA	NA	NA	ScienceComplex	Conventional 2013-2015	Summer
112	56	2013-06-20	2013	2	0	0	0	35.1	NA	NA	NA	Annex	Ornilux 2013-2015	Summer
113	57	2013-06-21	2013	17	0	0	0	110.5	NA	NA	NA	ScienceComplex	Conventional 2013-2015	Summer
114	57	2013-06-21	2013	17	0	0	0	35.1	NA	NA	NA	Annex	Ornilux 2013-2015	Summer
115	58	2013-06-24	2013	2	0	0	0	110.5	NA	NA	NA	ScienceComplex	Conventional 2013-2015	Summer
116	58	2013-06-24	2013	2	0	0	0	35.1	NA	NA	NA	Annex	Ornilux 2013-2015	Summer
117	59	2013-06-25	2013	2	0	0	0	110.5	NA	NA	NA	ScienceComplex	Conventional 2013-2015	Summer
118	59	2013-06-25	2013	2	0	0	0	35.1	NA	NA	NA	Annex	Ornilux 2013-2015	Summer
119	60	2013-06-26	2013	2	0	0	0	110.5	NA	NA	NA	ScienceComplex	Conventional 2013-2015	Summer
120	60	2013-06-26	2013	2	0	0	0	35.1	NA	NA	NA	Annex	Ornilux 2013-2015	Summer
121	61	2013-06-27	2013	2	0	0	0	110.5	NA	NA	NA	ScienceComplex	Conventional 2013-2015	Summer
122	61	2013-06-27	2013	2	0	0	0	35.1	NA	NA	NA	Annex	Ornilux 2013-2015	Summer
123	62	2013-06-28	2013	2	0	0	0	110.5	NA	NA	NA	ScienceComplex	Conventional 2013-2015	Summer
124	62	2013-06-28	2013	2	0	0	0	35.1	NA	NA	NA	Annex	Ornilux 2013-2015	Summer
125	63	2013-07-02	2013	2	0	0	0	110.5	NA	NA	NA	ScienceComplex	Conventional 2013-2015	Summer
126	63	2013-07-02	2013	2	0	0	0	35.1	NA	NA	NA	Annex	Ornilux 2013-2015	Summer
127	64	2013-07-03	2013	2	0	0	0	110.5	NA	NA	NA	ScienceComplex	Conventional 2013-2015	Summer
128	64	2013-07-03	2013	2	0	0	0	35.1	NA	NA	NA	Annex	Ornilux 2013-2015	Summer
129	65	2013-07-04	2013	2	0	0	0	110.5	NA	NA	NA	ScienceComplex	Conventional 2013-2015	Summer
130	65	2013-07-04	2013	2	0	0	0	35.1	NA	NA	NA	Annex	Ornilux 2013-2015	Summer
131	66	2013-07-05	2013	2	0	0	0	110.5	NA	NA	NA	ScienceComplex	Conventional 2013-2015	Summer
132	66	2013-07-05	2013	2	0	0	0	35.1	NA	NA	NA	Annex	Ornilux 2013-2015	Summer
133	67	2013-07-08	2013	2	0	0	0	110.5	NA	NA	NA	ScienceComplex	Conventional 2013-2015	Summer
134	67	2013-07-08	2013	2	0	0	0	35.1	NA	NA	NA	Annex	Ornilux 2013-2015	Summer
135	68	2013-07-09	2013	2	0	0	0	110.5	NA	NA	NA	ScienceComplex	Conventional 2013-2015	Summer
136	68	2013-07-09	2013	2	0	0	0	35.1	NA	NA	NA	Annex	Ornilux 2013-2015	Summer
137	69	2013-07-10	2013	2	0	0	0	110.5	NA	NA	NA	ScienceComplex	Conventional 2013-2015	Summer
138	69	2013-07-10	2013	2	0	0	0	35.1	NA	NA	NA	Annex	Ornilux 2013-2015	Summer
139	70	2013-07-11	2013	2	0	0	0	110.5	NA	NA	NA	ScienceComplex	Conventional 2013-2015	Summer
140	70	2013-07-11	2013	2	0	0	0	35.1	NA	NA	NA	Annex	Ornilux 2013-2015	Summer
141	71	2013-07-12	2013	2	0	0	0	110.5	NA	NA	NA	ScienceComplex	Conventional 2013-2015	Summer
142	71	2013-07-12	2013	2	0	0	0	35.1	NA	NA	NA	Annex	Ornilux 2013-2015	Summer
143	72	2013-07-15	2013	2	0	0	0	110.5	NA	NA	NA	ScienceComplex	Conventional 2013-2015	Summer
144	72	2013-07-15	2013	2	0	0	0	35.1	NA	NA	NA	Annex	Ornilux 2013-2015	Summer
145	73	2013-07-16	2013	2	0	0	0	110.5	NA	NA	NA	ScienceComplex	Conventional 2013-2015	Summer
146	73	2013-07-16	2013	2	0	0	0	35.1	NA	NA	NA	Annex	Ornilux 2013-2015	Summer
147	74	2013-07-17	2013	2	0	0	0	110.5	NA	NA	NA	ScienceComplex	Conventional 2013-2015	Summer
148	74	2013-07-17	2013	2	0	0	0	35.1	NA	NA	NA	Annex	Ornilux 2013-2015	Summer
149	75	2013-07-18	2013	2	0	0	0	110.5	NA	NA	NA	ScienceComplex	Conventional 2013-2015	Summer
150	75	2013-07-18	2013	2	0	0	0	35.1	NA	NA	NA	Annex	Ornilux 2013-2015	Summer
151	76	2013-07-19	2013	2	0	0	0	110.5	NA	NA	NA	ScienceComplex	Conventional 2013-2015	Summer
152	76	2013-07-19	2013	2	0	0	0	35.1	NA	NA	NA	Annex	Ornilux 2013-2015	Summer
5	3	2013-07-22	2013	2	1	0	1	110.5	SOSP	HY	b1.9	ScienceComplex	Conventional 2013-2015	Summer
6	3	2013-07-22	2013	2	0	0	0	35.1	NA	NA	NA	Annex	Ornilux 2013-2015	Summer
153	77	2013-07-23	2013	2	0	0	0	110.5	NA	NA	NA	ScienceComplex	Conventional 2013-2015	Summer
154	77	2013-07-23	2013	2	0	0	0	35.1	NA	NA	NA	Annex	Ornilux 2013-2015	Summer
155	78	2013-07-24	2013	2	0	0	0	110.5	NA	NA	NA	ScienceComplex	Conventional 2013-2015	Summer
156	78	2013-07-24	2013	2	0	0	0	35.1	NA	NA	NA	Annex	Ornilux 2013-2015	Summer
157	79	2013-07-25	2013	2	0	0	0	110.5	NA	NA	NA	ScienceComplex	Conventional 2013-2015	Summer
158	79	2013-07-25	2013	2	0	0	0	35.1	NA	NA	NA	Annex	Ornilux 2013-2015	Summer
159	80	2013-07-26	2013	2	0	0	0	110.5	NA	NA	NA	ScienceComplex	Conventional 2013-2015	Summer
160	80	2013-07-26	2013	2	0	0	0	35.1	NA	NA	NA	Annex	Ornilux 2013-2015	Summer
161	81	2013-07-29	2013	2	0	0	0	110.5	NA	NA	NA	ScienceComplex	Conventional 2013-2015	Summer
162	81	2013-07-29	2013	2	0	0	0	35.1	NA	NA	NA	Annex	Ornilux 2013-2015	Summer
163	82	2013-07-30	2013	2	0	0	0	110.5	NA	NA	NA	ScienceComplex	Conventional 2013-2015	Summer
164	82	2013-07-30	2013	2	0	0	0	35.1	NA	NA	NA	Annex	Ornilux 2013-2015	Summer
165	83	2013-07-31	2013	2	0	0	0	110.5	NA	NA	NA	ScienceComplex	Conventional 2013-2015	Summer
166	83	2013-07-31	2013	2	0	0	0	35.1	NA	NA	NA	Annex	Ornilux 2013-2015	Summer
167	84	2013-08-01	2013	2	0	0	0	110.5	NA	NA	NA	ScienceComplex	Conventional 2013-2015	Summer
168	84	2013-08-01	2013	2	0	0	0	35.1	NA	NA	NA	Annex	Ornilux 2013-2015	Summer
169	85	2013-08-02	2013	2	0	0	0	110.5	NA	NA	NA	ScienceComplex	Conventional 2013-2015	Summer
170	85	2013-08-02	2013	2	0	0	0	35.1	NA	NA	NA	Annex	Ornilux 2013-2015	Summer
171	86	2013-08-06	2013	2	0	0	0	110.5	NA	NA	NA	ScienceComplex	Conventional 2013-2015	Summer
172	86	2013-08-06	2013	2	0	0	0	35.1	NA	NA	NA	Annex	Ornilux 2013-2015	Summer
173	87	2013-08-07	2013	2	0	0	0	110.5	NA	NA	NA	ScienceComplex	Conventional 2013-2015	Summer
174	87	2013-08-07	2013	2	0	0	0	35.1	NA	NA	NA	Annex	Ornilux 2013-2015	Summer
175	88	2013-08-08	2013	2	0	0	0	110.5	NA	NA	NA	ScienceComplex	Conventional 2013-2015	Summer
176	88	2013-08-08	2013	2	0	0	0	35.1	NA	NA	NA	Annex	Ornilux 2013-2015	Summer
177	89	2013-08-09	2013	2	0	0	0	110.5	NA	NA	NA	ScienceComplex	Conventional 2013-2015	Summer
178	89	2013-08-09	2013	2	0	0	0	35.1	NA	NA	NA	Annex	Ornilux 2013-2015	Summer
179	90	2013-08-12	2013	2	0	0	0	110.5	NA	NA	NA	ScienceComplex	Conventional 2013-2015	Summer
180	90	2013-08-12	2013	2	0	0	0	35.1	NA	NA	NA	Annex	Ornilux 2013-2015	Summer
181	91	2013-08-13	2013	2	0	0	0	110.5	NA	NA	NA	ScienceComplex	Conventional 2013-2015	Summer
182	91	2013-08-13	2013	2	0	0	0	35.1	NA	NA	NA	Annex	Ornilux 2013-2015	Summer
183	92	2013-08-14	2013	2	0	0	0	110.5	NA	NA	NA	ScienceComplex	Conventional 2013-2015	Summer
184	92	2013-08-14	2013	2	0	0	0	35.1	NA	NA	NA	Annex	Ornilux 2013-2015	Summer
185	93	2013-08-15	2013	2	0	0	0	110.5	NA	NA	NA	ScienceComplex	Conventional 2013-2015	Summer
186	93	2013-08-15	2013	2	0	0	0	35.1	NA	NA	NA	Annex	Ornilux 2013-2015	Summer
187	94	2013-08-16	2013	2	0	0	0	110.5	NA	NA	NA	ScienceComplex	Conventional 2013-2015	Summer
188	94	2013-08-16	2013	2	0	0	0	35.1	NA	NA	NA	Annex	Ornilux 2013-2015	Summer
189	95	2013-08-27	2013	4	0	0	0	110.5	NA	NA	NA	ScienceComplex	Conventional 2013-2015	Summer
190	95	2013-08-27	2013	4	0	0	0	35.1	NA	NA	NA	Annex	Ornilux 2013-2015	Summer
7	4	2013-08-28	2013	3	0	0	0	110.5	NA	NA	NA	ScienceComplex	Conventional 2013-2015	Summer
8	4	2013-08-28	2013	3	1	0	1	35.1	HOFI	UK	b2.3	Annex	Ornilux 2013-2015	Summer
191	96	2013-08-29	2013	3	0	0	0	110.5	NA	NA	NA	ScienceComplex	Conventional 2013-2015	Summer
192	96	2013-08-29	2013	3	0	0	0	35.1	NA	NA	NA	Annex	Ornilux 2013-2015	Summer
193	97	2013-09-03	2013	4	0	0	0	110.5	NA	NA	NA	ScienceComplex	Conventional 2013-2015	Fall
194	97	2013-09-03	2013	4	0	0	0	35.1	NA	NA	NA	Annex	Ornilux 2013-2015	Fall
195	98	2013-09-04	2013	13	0	0	0	110.5	NA	NA	NA	ScienceComplex	Conventional 2013-2015	Fall
196	98	2013-09-04	2013	13	0	0	0	35.1	NA	NA	NA	Annex	Ornilux 2013-2015	Fall
197	99	2013-09-05	2013	4	0	0	0	110.5	NA	NA	NA	ScienceComplex	Conventional 2013-2015	Fall
198	99	2013-09-05	2013	4	0	0	0	35.1	NA	NA	NA	Annex	Ornilux 2013-2015	Fall
199	100	2013-09-09	2013	1	0	0	0	110.5	NA	NA	NA	ScienceComplex	Conventional 2013-2015	Fall
200	100	2013-09-09	2013	1	0	0	0	35.1	NA	NA	NA	Annex	Ornilux 2013-2015	Fall
201	101	2013-09-10	2013	18	0	0	0	110.5	NA	NA	NA	ScienceComplex	Conventional 2013-2015	Fall
202	101	2013-09-10	2013	18	0	0	0	35.1	NA	NA	NA	Annex	Ornilux 2013-2015	Fall
203	102	2013-09-11	2013	3	0	0	0	110.5	NA	NA	NA	ScienceComplex	Conventional 2013-2015	Fall
204	102	2013-09-11	2013	3	0	0	0	35.1	NA	NA	NA	Annex	Ornilux 2013-2015	Fall
205	103	2013-09-12	2013	4	0	0	0	110.5	NA	NA	NA	ScienceComplex	Conventional 2013-2015	Fall
206	103	2013-09-12	2013	4	0	0	0	35.1	NA	NA	NA	Annex	Ornilux 2013-2015	Fall
207	104	2013-09-13	2013	8	0	1	1	110.5	UNID	UK	b1.9	ScienceComplex	Conventional 2013-2015	Fall
208	104	2013-09-13	2013	8	0	0	0	35.1	NA	NA	NA	Annex	Ornilux 2013-2015	Fall
209	105	2013-09-16	2013	1	0	0	0	110.5	NA	NA	NA	ScienceComplex	Conventional 2013-2015	Fall
210	105	2013-09-16	2013	1	0	0	0	35.1	NA	NA	NA	Annex	Ornilux 2013-2015	Fall
211	106	2013-09-17	2013	18	0	0	0	110.5	NA	NA	NA	ScienceComplex	Conventional 2013-2015	Fall
212	106	2013-09-17	2013	18	0	0	0	35.1	NA	NA	NA	Annex	Ornilux 2013-2015	Fall
213	107	2013-09-18	2013	8	0	1	1	110.5	UNID	UK	b1.8	ScienceComplex	Conventional 2013-2015	Fall
214	107	2013-09-18	2013	8	0	0	0	35.1	NA	NA	NA	Annex	Ornilux 2013-2015	Fall
215	108	2013-09-19	2013	4	0	0	0	110.5	NA	NA	NA	ScienceComplex	Conventional 2013-2015	Fall
216	108	2013-09-19	2013	4	0	0	0	35.1	NA	NA	NA	Annex	Ornilux 2013-2015	Fall
217	109	2013-09-21	2013	8	0	0	0	110.5	NA	NA	NA	ScienceComplex	Conventional 2013-2015	Fall
218	109	2013-09-21	2013	8	0	0	0	35.1	NA	NA	NA	Annex	Ornilux 2013-2015	Fall
219	110	2013-09-24	2013	4	0	0	0	110.5	NA	NA	NA	ScienceComplex	Conventional 2013-2015	Fall
220	110	2013-09-24	2013	4	0	0	0	35.1	NA	NA	NA	Annex	Ornilux 2013-2015	Fall
221	111	2013-09-25	2013	3	0	0	0	110.5	NA	NA	NA	ScienceComplex	Conventional 2013-2015	Fall
222	111	2013-09-25	2013	3	0	0	0	35.1	NA	NA	NA	Annex	Ornilux 2013-2015	Fall
223	112	2013-09-26	2013	3	0	0	0	110.5	NA	NA	NA	ScienceComplex	Conventional 2013-2015	Fall
224	112	2013-09-26	2013	3	0	0	0	35.1	NA	NA	NA	Annex	Ornilux 2013-2015	Fall
225	113	2013-09-30	2013	8	0	0	0	110.5	NA	NA	NA	ScienceComplex	Conventional 2013-2015	Fall
226	113	2013-09-30	2013	8	0	0	0	35.1	NA	NA	NA	Annex	Ornilux 2013-2015	Fall
227	114	2013-10-01	2013	4	0	0	0	110.5	NA	NA	NA	ScienceComplex	Conventional 2013-2015	Fall
228	114	2013-10-01	2013	4	0	0	0	35.1	NA	NA	NA	Annex	Ornilux 2013-2015	Fall
229	115	2013-10-04	2013	14	0	0	0	110.5	NA	NA	NA	ScienceComplex	Conventional 2013-2015	Fall
230	115	2013-10-04	2013	14	0	0	0	35.1	NA	NA	NA	Annex	Ornilux 2013-2015	Fall
231	116	2013-10-07	2013	8	0	0	0	110.5	NA	NA	NA	ScienceComplex	Conventional 2013-2015	Fall
232	116	2013-10-07	2013	8	0	0	0	35.1	NA	NA	NA	Annex	Ornilux 2013-2015	Fall
233	117	2013-10-08	2013	4	0	0	0	110.5	NA	NA	NA	ScienceComplex	Conventional 2013-2015	Fall
234	117	2013-10-08	2013	4	0	0	0	35.1	NA	NA	NA	Annex	Ornilux 2013-2015	Fall
235	118	2013-10-09	2013	8	0	0	0	110.5	NA	NA	NA	ScienceComplex	Conventional 2013-2015	Fall
236	118	2013-10-09	2013	8	0	0	0	35.1	NA	NA	NA	Annex	Ornilux 2013-2015	Fall
237	119	2013-10-10	2013	4	0	1	1	110.5	UNID	UK	b1.9	ScienceComplex	Conventional 2013-2015	Fall
238	119	2013-10-10	2013	4	0	0	0	35.1	NA	NA	NA	Annex	Ornilux 2013-2015	Fall
239	120	2013-10-15	2013	19	0	0	0	110.5	NA	NA	NA	ScienceComplex	Conventional 2013-2015	Fall
240	120	2013-10-15	2013	19	0	0	0	35.1	NA	NA	NA	Annex	Ornilux 2013-2015	Fall
241	121	2013-10-16	2013	8	0	0	0	110.5	NA	NA	NA	ScienceComplex	Conventional 2013-2015	Fall
242	121	2013-10-16	2013	8	0	0	0	35.1	NA	NA	NA	Annex	Ornilux 2013-2015	Fall
243	122	2013-10-17	2013	8	0	0	0	110.5	NA	NA	NA	ScienceComplex	Conventional 2013-2015	Fall
244	122	2013-10-17	2013	8	0	0	0	35.1	NA	NA	NA	Annex	Ornilux 2013-2015	Fall
245	123	2013-10-21	2013	8	0	0	0	110.5	NA	NA	NA	ScienceComplex	Conventional 2013-2015	Fall
246	123	2013-10-21	2013	8	0	0	0	35.1	NA	NA	NA	Annex	Ornilux 2013-2015	Fall
247	124	2013-10-22	2013	19	0	0	0	110.5	NA	NA	NA	ScienceComplex	Conventional 2013-2015	Fall
248	124	2013-10-22	2013	19	0	0	0	35.1	NA	NA	NA	Annex	Ornilux 2013-2015	Fall
249	125	2013-10-23	2013	8	0	0	0	110.5	NA	NA	NA	ScienceComplex	Conventional 2013-2015	Fall
250	125	2013-10-23	2013	8	0	1	1	35.1	UNID	UK	b2.3	Annex	Ornilux 2013-2015	Fall
251	126	2013-10-25	2013	14	0	1	1	110.5	UNID	UK	b1.4	ScienceComplex	Conventional 2013-2015	Fall
252	126	2013-10-25	2013	14	0	0	0	35.1	NA	NA	NA	Annex	Ornilux 2013-2015	Fall
253	127	2013-10-29	2013	19	0	0	0	110.5	NA	NA	NA	ScienceComplex	Conventional 2013-2015	Fall
254	127	2013-10-29	2013	19	0	0	0	35.1	NA	NA	NA	Annex	Ornilux 2013-2015	Fall
255	128	2013-10-30	2013	8	0	0	0	110.5	NA	NA	NA	ScienceComplex	Conventional 2013-2015	Fall
256	128	2013-10-30	2013	8	0	0	0	35.1	NA	NA	NA	Annex	Ornilux 2013-2015	Fall
257	129	2013-10-31	2013	3	0	0	0	110.5	NA	NA	NA	ScienceComplex	Conventional 2013-2015	Fall
258	129	2013-10-31	2013	3	0	0	0	35.1	NA	NA	NA	Annex	Ornilux 2013-2015	Fall
259	130	2013-11-01	2013	8	0	0	0	110.5	NA	NA	NA	ScienceComplex	Conventional 2013-2015	Fall
260	130	2013-11-01	2013	8	0	0	0	35.1	NA	NA	NA	Annex	Ornilux 2013-2015	Fall
261	131	2013-11-05	2013	4	0	0	0	110.5	NA	NA	NA	ScienceComplex	Conventional 2013-2015	Fall
262	131	2013-11-05	2013	4	0	0	0	35.1	NA	NA	NA	Annex	Ornilux 2013-2015	Fall
263	132	2013-11-06	2013	8	0	0	0	110.5	NA	NA	NA	ScienceComplex	Conventional 2013-2015	Fall
264	132	2013-11-06	2013	8	0	0	0	35.1	NA	NA	NA	Annex	Ornilux 2013-2015	Fall
265	133	2013-11-07	2013	8	0	0	0	110.5	NA	NA	NA	ScienceComplex	Conventional 2013-2015	Fall
266	133	2013-11-07	2013	8	0	0	0	35.1	NA	NA	NA	Annex	Ornilux 2013-2015	Fall
267	134	2013-11-08	2013	20	0	0	0	110.5	NA	NA	NA	ScienceComplex	Conventional 2013-2015	Fall
268	134	2013-11-08	2013	20	0	0	0	35.1	NA	NA	NA	Annex	Ornilux 2013-2015	Fall
269	135	2013-11-12	2013	4	0	0	0	110.5	NA	NA	NA	ScienceComplex	Conventional 2013-2015	Fall
270	135	2013-11-12	2013	4	0	0	0	35.1	NA	NA	NA	Annex	Ornilux 2013-2015	Fall
271	136	2013-11-13	2013	8	0	0	0	110.5	NA	NA	NA	ScienceComplex	Conventional 2013-2015	Fall
272	136	2013-11-13	2013	8	0	0	0	35.1	NA	NA	NA	Annex	Ornilux 2013-2015	Fall
273	137	2013-11-14	2013	8	0	0	0	110.5	NA	NA	NA	ScienceComplex	Conventional 2013-2015	Fall
274	137	2013-11-14	2013	8	0	0	0	35.1	NA	NA	NA	Annex	Ornilux 2013-2015	Fall
275	138	2013-11-15	2013	3	0	0	0	110.5	NA	NA	NA	ScienceComplex	Conventional 2013-2015	Fall
276	138	2013-11-15	2013	3	0	0	0	35.1	NA	NA	NA	Annex	Ornilux 2013-2015	Fall
277	139	2013-11-19	2013	8	0	0	0	110.5	NA	NA	NA	ScienceComplex	Conventional 2013-2015	Fall
278	139	2013-11-19	2013	8	0	0	0	35.1	NA	NA	NA	Annex	Ornilux 2013-2015	Fall
279	140	2013-11-20	2013	8	0	0	0	110.5	NA	NA	NA	ScienceComplex	Conventional 2013-2015	Fall
280	140	2013-11-20	2013	8	0	0	0	35.1	NA	NA	NA	Annex	Ornilux 2013-2015	Fall
281	141	2013-11-21	2013	8	0	0	0	110.5	NA	NA	NA	ScienceComplex	Conventional 2013-2015	Fall
282	141	2013-11-21	2013	8	0	0	0	35.1	NA	NA	NA	Annex	Ornilux 2013-2015	Fall
283	142	2013-11-22	2013	8	0	0	0	110.5	NA	NA	NA	ScienceComplex	Conventional 2013-2015	Fall
284	142	2013-11-22	2013	8	0	0	0	35.1	NA	NA	NA	Annex	Ornilux 2013-2015	Fall
285	143	2013-11-25	2013	8	0	0	0	110.5	NA	NA	NA	ScienceComplex	Conventional 2013-2015	Fall
286	143	2013-11-25	2013	8	0	0	0	35.1	NA	NA	NA	Annex	Ornilux 2013-2015	Fall
287	144	2013-11-26	2013	4	0	1	1	110.5	UNID	UK	b1.11	ScienceComplex	Conventional 2013-2015	Fall
288	144	2013-11-26	2013	4	0	0	0	35.1	NA	NA	NA	Annex	Ornilux 2013-2015	Fall
289	145	2013-11-27	2013	18	0	0	0	110.5	NA	NA	NA	ScienceComplex	Conventional 2013-2015	Fall
290	145	2013-11-27	2013	18	0	0	0	35.1	NA	NA	NA	Annex	Ornilux 2013-2015	Fall
291	146	2013-11-28	2013	3	0	0	0	110.5	NA	NA	NA	ScienceComplex	Conventional 2013-2015	Fall
292	146	2013-11-28	2013	3	0	0	0	35.1	NA	NA	NA	Annex	Ornilux 2013-2015	Fall
293	147	2013-11-29	2013	8	0	0	0	110.5	NA	NA	NA	ScienceComplex	Conventional 2013-2015	Fall
294	147	2013-11-29	2013	8	0	0	0	35.1	NA	NA	NA	Annex	Ornilux 2013-2015	Fall
295	148	2013-12-02	2013	8	0	0	0	110.5	NA	NA	NA	ScienceComplex	Conventional 2013-2015	Winter
296	148	2013-12-02	2013	8	0	0	0	35.1	NA	NA	NA	Annex	Ornilux 2013-2015	Winter
297	149	2013-12-03	2013	4	0	1	1	110.5	UNID	UK	b1.1	ScienceComplex	Conventional 2013-2015	Winter
298	149	2013-12-03	2013	4	0	0	0	35.1	NA	NA	NA	Annex	Ornilux 2013-2015	Winter
299	150	2013-12-04	2013	3	0	0	0	110.5	NA	NA	NA	ScienceComplex	Conventional 2013-2015	Winter
300	150	2013-12-04	2013	3	0	0	0	35.1	NA	NA	NA	Annex	Ornilux 2013-2015	Winter
301	151	2013-12-06	2013	8	0	1	1	110.5	UNID	UK	b1.2	ScienceComplex	Conventional 2013-2015	Winter
302	151	2013-12-06	2013	8	0	0	0	35.1	NA	NA	NA	Annex	Ornilux 2013-2015	Winter
303	152	2013-12-11	2013	18	0	0	0	110.5	NA	NA	NA	ScienceComplex	Conventional 2013-2015	Winter
304	152	2013-12-11	2013	18	0	0	0	35.1	NA	NA	NA	Annex	Ornilux 2013-2015	Winter
305	153	2013-12-12	2013	18	0	0	0	110.5	NA	NA	NA	ScienceComplex	Conventional 2013-2015	Winter
306	153	2013-12-12	2013	18	0	0	0	35.1	NA	NA	NA	Annex	Ornilux 2013-2015	Winter
307	154	2013-12-13	2013	8	0	0	0	110.5	NA	NA	NA	ScienceComplex	Conventional 2013-2015	Winter
308	154	2013-12-13	2013	8	0	0	0	35.1	NA	NA	NA	Annex	Ornilux 2013-2015	Winter
9	5	2013-12-17	2013	4	1	0	1	110.5	DEJU	UK	b1.8	ScienceComplex	Conventional 2013-2015	Winter
10	5	2013-12-17	2013	4	0	0	0	35.1	NA	NA	NA	Annex	Ornilux 2013-2015	Winter
309	155	2013-12-18	2013	3	0	0	0	110.5	NA	NA	NA	ScienceComplex	Conventional 2013-2015	Winter
310	155	2013-12-18	2013	3	0	0	0	35.1	NA	NA	NA	Annex	Ornilux 2013-2015	Winter
311	156	2013-12-19	2013	13	0	0	0	110.5	NA	NA	NA	ScienceComplex	Conventional 2013-2015	Winter
312	156	2013-12-19	2013	13	0	0	0	35.1	NA	NA	NA	Annex	Ornilux 2013-2015	Winter
313	157	2013-12-20	2013	3	0	0	0	110.5	NA	NA	NA	ScienceComplex	Conventional 2013-2015	Winter
314	157	2013-12-20	2013	3	0	0	0	35.1	NA	NA	NA	Annex	Ornilux 2013-2015	Winter
315	158	2013-12-23	2013	12	0	0	0	110.5	NA	NA	NA	ScienceComplex	Conventional 2013-2015	Winter
316	158	2013-12-23	2013	12	0	0	0	35.1	NA	NA	NA	Annex	Ornilux 2013-2015	Winter
317	159	2013-12-24	2013	3	0	0	0	110.5	NA	NA	NA	ScienceComplex	Conventional 2013-2015	Winter
318	159	2013-12-24	2013	3	0	0	0	35.1	NA	NA	NA	Annex	Ornilux 2013-2015	Winter
319	160	2013-12-31	2013	4	0	1	1	110.5	UNID	UK	b1.4	ScienceComplex	Conventional 2013-2015	Winter
320	160	2013-12-31	2013	4	0	0	0	35.1	NA	NA	NA	Annex	Ornilux 2013-2015	Winter
321	161	2014-01-02	2014	8	0	0	0	110.5	NA	NA	NA	ScienceComplex	Conventional 2013-2015	Winter
322	161	2014-01-02	2014	8	0	0	0	35.1	NA	NA	NA	Annex	Ornilux 2013-2015	Winter
323	162	2014-01-03	2014	8	0	0	0	110.5	NA	NA	NA	ScienceComplex	Conventional 2013-2015	Winter
324	162	2014-01-03	2014	8	0	0	0	35.1	NA	NA	NA	Annex	Ornilux 2013-2015	Winter
325	163	2014-01-07	2014	4	0	0	0	110.5	NA	NA	NA	ScienceComplex	Conventional 2013-2015	Winter
326	163	2014-01-07	2014	4	0	0	0	35.1	NA	NA	NA	Annex	Ornilux 2013-2015	Winter
327	164	2014-01-09	2014	3	0	0	0	110.5	NA	NA	NA	ScienceComplex	Conventional 2013-2015	Winter
328	164	2014-01-09	2014	3	0	0	0	35.1	NA	NA	NA	Annex	Ornilux 2013-2015	Winter
329	165	2014-01-10	2014	3	0	0	0	110.5	NA	NA	NA	ScienceComplex	Conventional 2013-2015	Winter
330	165	2014-01-10	2014	3	0	0	0	35.1	NA	NA	NA	Annex	Ornilux 2013-2015	Winter
331	166	2014-01-14	2014	4	0	0	0	110.5	NA	NA	NA	ScienceComplex	Conventional 2013-2015	Winter
332	166	2014-01-14	2014	4	0	0	0	35.1	NA	NA	NA	Annex	Ornilux 2013-2015	Winter
333	167	2014-01-15	2014	3	0	0	0	110.5	NA	NA	NA	ScienceComplex	Conventional 2013-2015	Winter
334	167	2014-01-15	2014	3	0	0	0	35.1	NA	NA	NA	Annex	Ornilux 2013-2015	Winter
335	168	2014-01-16	2014	3	0	0	0	110.5	NA	NA	NA	ScienceComplex	Conventional 2013-2015	Winter
336	168	2014-01-16	2014	3	0	0	0	35.1	NA	NA	NA	Annex	Ornilux 2013-2015	Winter
337	169	2014-01-17	2014	3	0	0	0	110.5	NA	NA	NA	ScienceComplex	Conventional 2013-2015	Winter
338	169	2014-01-17	2014	3	0	0	0	35.1	NA	NA	NA	Annex	Ornilux 2013-2015	Winter
11	6	2014-01-21	2014	4	1	0	1	110.5	HETH	SY	b1.5	ScienceComplex	Conventional 2013-2015	Winter
12	6	2014-01-21	2014	4	0	0	0	35.1	NA	NA	NA	Annex	Ornilux 2013-2015	Winter
339	170	2014-01-22	2014	3	0	0	0	110.5	NA	NA	NA	ScienceComplex	Conventional 2013-2015	Winter
340	170	2014-01-22	2014	3	0	0	0	35.1	NA	NA	NA	Annex	Ornilux 2013-2015	Winter
341	171	2014-01-23	2014	21	0	0	0	110.5	NA	NA	NA	ScienceComplex	Conventional 2013-2015	Winter
342	171	2014-01-23	2014	21	0	0	0	35.1	NA	NA	NA	Annex	Ornilux 2013-2015	Winter
343	172	2014-01-24	2014	3	0	0	0	110.5	NA	NA	NA	ScienceComplex	Conventional 2013-2015	Winter
344	172	2014-01-24	2014	3	0	0	0	35.1	NA	NA	NA	Annex	Ornilux 2013-2015	Winter
345	173	2014-01-28	2014	4	0	0	0	110.5	NA	NA	NA	ScienceComplex	Conventional 2013-2015	Winter
346	173	2014-01-28	2014	4	0	0	0	35.1	NA	NA	NA	Annex	Ornilux 2013-2015	Winter
347	174	2014-01-29	2014	3	0	0	0	110.5	NA	NA	NA	ScienceComplex	Conventional 2013-2015	Winter
348	174	2014-01-29	2014	3	0	0	0	35.1	NA	NA	NA	Annex	Ornilux 2013-2015	Winter
349	175	2014-01-30	2014	3	0	0	0	110.5	NA	NA	NA	ScienceComplex	Conventional 2013-2015	Winter
350	175	2014-01-30	2014	3	0	0	0	35.1	NA	NA	NA	Annex	Ornilux 2013-2015	Winter
351	176	2014-02-03	2014	22	0	0	0	110.5	NA	NA	NA	ScienceComplex	Conventional 2013-2015	Winter
352	176	2014-02-03	2014	22	0	0	0	35.1	NA	NA	NA	Annex	Ornilux 2013-2015	Winter
353	177	2014-02-04	2014	4	0	0	0	110.5	NA	NA	NA	ScienceComplex	Conventional 2013-2015	Winter
354	177	2014-02-04	2014	4	0	0	0	35.1	NA	NA	NA	Annex	Ornilux 2013-2015	Winter
355	178	2014-02-05	2014	3	0	0	0	110.5	NA	NA	NA	ScienceComplex	Conventional 2013-2015	Winter
356	178	2014-02-05	2014	3	0	0	0	35.1	NA	NA	NA	Annex	Ornilux 2013-2015	Winter
357	179	2014-02-06	2014	4	0	0	0	110.5	NA	NA	NA	ScienceComplex	Conventional 2013-2015	Winter
358	179	2014-02-06	2014	4	0	0	0	35.1	NA	NA	NA	Annex	Ornilux 2013-2015	Winter
359	180	2014-02-07	2014	3	0	0	0	110.5	NA	NA	NA	ScienceComplex	Conventional 2013-2015	Winter
360	180	2014-02-07	2014	3	0	0	0	35.1	NA	NA	NA	Annex	Ornilux 2013-2015	Winter
361	181	2014-02-11	2014	4	0	0	0	110.5	NA	NA	NA	ScienceComplex	Conventional 2013-2015	Winter
362	181	2014-02-11	2014	4	0	0	0	35.1	NA	NA	NA	Annex	Ornilux 2013-2015	Winter
363	182	2014-02-12	2014	3	0	0	0	110.5	NA	NA	NA	ScienceComplex	Conventional 2013-2015	Winter
364	182	2014-02-12	2014	3	0	0	0	35.1	NA	NA	NA	Annex	Ornilux 2013-2015	Winter
365	183	2014-02-13	2014	3	0	0	0	110.5	NA	NA	NA	ScienceComplex	Conventional 2013-2015	Winter
366	183	2014-02-13	2014	3	0	0	0	35.1	NA	NA	NA	Annex	Ornilux 2013-2015	Winter
367	184	2014-02-14	2014	22	0	0	0	110.5	NA	NA	NA	ScienceComplex	Conventional 2013-2015	Winter
368	184	2014-02-14	2014	22	0	0	0	35.1	NA	NA	NA	Annex	Ornilux 2013-2015	Winter
369	185	2014-02-17	2014	22	0	0	0	110.5	NA	NA	NA	ScienceComplex	Conventional 2013-2015	Winter
370	185	2014-02-17	2014	22	0	0	0	35.1	NA	NA	NA	Annex	Ornilux 2013-2015	Winter
371	186	2014-02-18	2014	4	0	0	0	110.5	NA	NA	NA	ScienceComplex	Conventional 2013-2015	Winter
372	186	2014-02-18	2014	4	0	0	0	35.1	NA	NA	NA	Annex	Ornilux 2013-2015	Winter
373	187	2014-02-19	2014	23	0	0	0	110.5	NA	NA	NA	ScienceComplex	Conventional 2013-2015	Winter
374	187	2014-02-19	2014	23	0	0	0	35.1	NA	NA	NA	Annex	Ornilux 2013-2015	Winter
375	188	2014-02-20	2014	19	0	0	0	110.5	NA	NA	NA	ScienceComplex	Conventional 2013-2015	Winter
376	188	2014-02-20	2014	19	0	0	0	35.1	NA	NA	NA	Annex	Ornilux 2013-2015	Winter
377	189	2014-02-21	2014	3	0	0	0	110.5	NA	NA	NA	ScienceComplex	Conventional 2013-2015	Winter
378	189	2014-02-21	2014	3	0	0	0	35.1	NA	NA	NA	Annex	Ornilux 2013-2015	Winter
379	190	2014-02-26	2014	4	0	0	0	110.5	NA	NA	NA	ScienceComplex	Conventional 2013-2015	Winter
380	190	2014-02-26	2014	4	0	0	0	35.1	NA	NA	NA	Annex	Ornilux 2013-2015	Winter
381	191	2014-02-27	2014	4	0	0	0	110.5	NA	NA	NA	ScienceComplex	Conventional 2013-2015	Winter
382	191	2014-02-27	2014	4	0	0	0	35.1	NA	NA	NA	Annex	Ornilux 2013-2015	Winter
383	192	2014-03-04	2014	4	0	0	0	110.5	NA	NA	NA	ScienceComplex	Conventional 2013-2015	Spring
384	192	2014-03-04	2014	4	0	0	0	35.1	NA	NA	NA	Annex	Ornilux 2013-2015	Spring
385	193	2014-03-06	2014	4	0	0	0	110.5	NA	NA	NA	ScienceComplex	Conventional 2013-2015	Spring
386	193	2014-03-06	2014	4	0	0	0	35.1	NA	NA	NA	Annex	Ornilux 2013-2015	Spring
387	194	2014-03-07	2014	3	0	1	1	110.5	GCKI	UK	b1.8	ScienceComplex	Conventional 2013-2015	Spring
388	194	2014-03-07	2014	3	0	0	0	35.1	NA	NA	NA	Annex	Ornilux 2013-2015	Spring
389	195	2014-03-11	2014	4	0	0	0	110.5	NA	NA	NA	ScienceComplex	Conventional 2013-2015	Spring
390	195	2014-03-11	2014	4	0	0	0	35.1	NA	NA	NA	Annex	Ornilux 2013-2015	Spring
391	196	2014-03-12	2014	21	0	0	0	110.5	NA	NA	NA	ScienceComplex	Conventional 2013-2015	Spring
392	196	2014-03-12	2014	21	0	0	0	35.1	NA	NA	NA	Annex	Ornilux 2013-2015	Spring
393	197	2014-03-13	2014	3	0	0	0	110.5	NA	NA	NA	ScienceComplex	Conventional 2013-2015	Spring
394	197	2014-03-13	2014	3	0	0	0	35.1	NA	NA	NA	Annex	Ornilux 2013-2015	Spring
395	198	2014-03-14	2014	21	0	0	0	110.5	NA	NA	NA	ScienceComplex	Conventional 2013-2015	Spring
396	198	2014-03-14	2014	21	0	0	0	35.1	NA	NA	NA	Annex	Ornilux 2013-2015	Spring
397	199	2014-03-17	2014	5	0	0	0	110.5	NA	NA	NA	ScienceComplex	Conventional 2013-2015	Spring
398	199	2014-03-17	2014	5	0	0	0	35.1	NA	NA	NA	Annex	Ornilux 2013-2015	Spring
399	200	2014-03-18	2014	4	0	0	0	110.5	NA	NA	NA	ScienceComplex	Conventional 2013-2015	Spring
400	200	2014-03-18	2014	4	0	0	0	35.1	NA	NA	NA	Annex	Ornilux 2013-2015	Spring
401	201	2014-03-19	2014	5	0	0	0	110.5	NA	NA	NA	ScienceComplex	Conventional 2013-2015	Spring
402	201	2014-03-19	2014	5	0	0	0	35.1	NA	NA	NA	Annex	Ornilux 2013-2015	Spring
403	202	2014-03-20	2014	13	0	0	0	110.5	NA	NA	NA	ScienceComplex	Conventional 2013-2015	Spring
404	202	2014-03-20	2014	13	0	0	0	35.1	NA	NA	NA	Annex	Ornilux 2013-2015	Spring
405	203	2014-03-24	2014	5	0	0	0	110.5	NA	NA	NA	ScienceComplex	Conventional 2013-2015	Spring
406	203	2014-03-24	2014	5	0	0	0	35.1	NA	NA	NA	Annex	Ornilux 2013-2015	Spring
407	204	2014-03-25	2014	4	0	0	0	110.5	NA	NA	NA	ScienceComplex	Conventional 2013-2015	Spring
408	204	2014-03-25	2014	4	0	0	0	35.1	NA	NA	NA	Annex	Ornilux 2013-2015	Spring
409	205	2014-03-27	2014	4	0	0	0	110.5	NA	NA	NA	ScienceComplex	Conventional 2013-2015	Spring
410	205	2014-03-27	2014	4	0	0	0	35.1	NA	NA	NA	Annex	Ornilux 2013-2015	Spring
411	206	2014-03-31	2014	5	0	0	0	110.5	NA	NA	NA	ScienceComplex	Conventional 2013-2015	Spring
412	206	2014-03-31	2014	5	0	0	0	35.1	NA	NA	NA	Annex	Ornilux 2013-2015	Spring
413	207	2014-04-01	2014	4	0	0	0	110.5	NA	NA	NA	ScienceComplex	Conventional 2013-2015	Spring
414	207	2014-04-01	2014	4	0	0	0	35.1	NA	NA	NA	Annex	Ornilux 2013-2015	Spring
415	208	2014-04-02	2014	5	0	0	0	110.5	NA	NA	NA	ScienceComplex	Conventional 2013-2015	Spring
416	208	2014-04-02	2014	5	0	0	0	35.1	NA	NA	NA	Annex	Ornilux 2013-2015	Spring
417	209	2014-04-03	2014	4	0	0	0	110.5	NA	NA	NA	ScienceComplex	Conventional 2013-2015	Spring
418	209	2014-04-03	2014	4	0	0	0	35.1	NA	NA	NA	Annex	Ornilux 2013-2015	Spring
419	210	2014-04-07	2014	5	0	0	0	110.5	NA	NA	NA	ScienceComplex	Conventional 2013-2015	Spring
420	210	2014-04-07	2014	5	0	0	0	35.1	NA	NA	NA	Annex	Ornilux 2013-2015	Spring
421	211	2014-04-08	2014	4	0	0	0	110.5	NA	NA	NA	ScienceComplex	Conventional 2013-2015	Spring
422	211	2014-04-08	2014	4	0	0	0	35.1	NA	NA	NA	Annex	Ornilux 2013-2015	Spring
423	212	2014-04-10	2014	4	0	0	0	110.5	NA	NA	NA	ScienceComplex	Conventional 2013-2015	Spring
424	212	2014-04-10	2014	4	0	0	0	35.1	NA	NA	NA	Annex	Ornilux 2013-2015	Spring
425	213	2014-04-14	2014	5	0	0	0	110.5	NA	NA	NA	ScienceComplex	Conventional 2013-2015	Spring
426	213	2014-04-14	2014	5	0	0	0	35.1	NA	NA	NA	Annex	Ornilux 2013-2015	Spring
427	214	2014-04-15	2014	4	0	0	0	110.5	NA	NA	NA	ScienceComplex	Conventional 2013-2015	Spring
428	214	2014-04-15	2014	4	0	0	0	35.1	NA	NA	NA	Annex	Ornilux 2013-2015	Spring
429	215	2014-04-16	2014	5	0	0	0	110.5	NA	NA	NA	ScienceComplex	Conventional 2013-2015	Spring
430	215	2014-04-16	2014	5	0	0	0	35.1	NA	NA	NA	Annex	Ornilux 2013-2015	Spring
431	216	2014-04-22	2014	20	0	0	0	110.5	NA	NA	NA	ScienceComplex	Conventional 2013-2015	Spring
432	216	2014-04-22	2014	20	0	0	0	35.1	NA	NA	NA	Annex	Ornilux 2013-2015	Spring
433	217	2014-04-23	2014	5	0	0	0	110.5	NA	NA	NA	ScienceComplex	Conventional 2013-2015	Spring
434	217	2014-04-23	2014	5	0	0	0	35.1	NA	NA	NA	Annex	Ornilux 2013-2015	Spring
435	218	2014-04-24	2014	4	0	0	0	110.5	NA	NA	NA	ScienceComplex	Conventional 2013-2015	Spring
436	218	2014-04-24	2014	4	0	0	0	35.1	NA	NA	NA	Annex	Ornilux 2013-2015	Spring
437	219	2014-04-25	2014	5	0	0	0	110.5	NA	NA	NA	ScienceComplex	Conventional 2013-2015	Spring
438	219	2014-04-25	2014	5	0	0	0	35.1	NA	NA	NA	Annex	Ornilux 2013-2015	Spring
13	7	2014-04-28	2014	5	1	0	1	110.5	HETH	ASY	b1.10	ScienceComplex	Conventional 2013-2015	Spring
14	7	2014-04-28	2014	5	0	0	0	35.1	NA	NA	NA	Annex	Ornilux 2013-2015	Spring
439	220	2014-04-29	2014	4	0	0	0	110.5	NA	NA	NA	ScienceComplex	Conventional 2013-2015	Spring
440	220	2014-04-29	2014	4	0	0	0	35.1	NA	NA	NA	Annex	Ornilux 2013-2015	Spring
441	221	2014-04-30	2014	5	0	0	0	110.5	NA	NA	NA	ScienceComplex	Conventional 2013-2015	Spring
442	221	2014-04-30	2014	5	0	0	0	35.1	NA	NA	NA	Annex	Ornilux 2013-2015	Spring
443	222	2014-05-06	2014	4	0	0	0	110.5	NA	NA	NA	ScienceComplex	Conventional 2013-2015	Spring
444	222	2014-05-06	2014	4	0	0	0	35.1	NA	NA	NA	Annex	Ornilux 2013-2015	Spring
445	223	2014-05-07	2014	5	0	0	0	110.5	NA	NA	NA	ScienceComplex	Conventional 2013-2015	Spring
446	223	2014-05-07	2014	5	0	0	0	35.1	NA	NA	NA	Annex	Ornilux 2013-2015	Spring
447	224	2014-05-12	2014	5	0	0	0	110.5	NA	NA	NA	ScienceComplex	Conventional 2013-2015	Spring
448	224	2014-05-12	2014	5	0	0	0	35.1	NA	NA	NA	Annex	Ornilux 2013-2015	Spring
449	225	2014-05-14	2014	5	0	0	0	110.5	NA	NA	NA	ScienceComplex	Conventional 2013-2015	Spring
450	225	2014-05-14	2014	5	0	0	0	35.1	NA	NA	NA	Annex	Ornilux 2013-2015	Spring
451	226	2014-05-15	2014	4	0	0	0	110.5	NA	NA	NA	ScienceComplex	Conventional 2013-2015	Spring
452	226	2014-05-15	2014	4	0	0	0	35.1	NA	NA	NA	Annex	Ornilux 2013-2015	Spring
453	227	2014-05-20	2014	5	0	0	0	110.5	NA	NA	NA	ScienceComplex	Conventional 2013-2015	Spring
454	227	2014-05-20	2014	5	0	0	0	35.1	NA	NA	NA	Annex	Ornilux 2013-2015	Spring
455	228	2014-05-21	2014	5	0	0	0	110.5	NA	NA	NA	ScienceComplex	Conventional 2013-2015	Spring
456	228	2014-05-21	2014	5	0	0	0	35.1	NA	NA	NA	Annex	Ornilux 2013-2015	Spring
457	229	2014-05-22	2014	5	0	0	0	110.5	NA	NA	NA	ScienceComplex	Conventional 2013-2015	Spring
458	229	2014-05-22	2014	5	0	0	0	35.1	NA	NA	NA	Annex	Ornilux 2013-2015	Spring
459	230	2014-05-27	2014	4	0	0	0	110.5	NA	NA	NA	ScienceComplex	Conventional 2013-2015	Spring
460	230	2014-05-27	2014	4	0	0	0	35.1	NA	NA	NA	Annex	Ornilux 2013-2015	Spring
461	231	2014-05-28	2014	5	0	0	0	110.5	NA	NA	NA	ScienceComplex	Conventional 2013-2015	Spring
462	231	2014-05-28	2014	5	0	0	0	35.1	NA	NA	NA	Annex	Ornilux 2013-2015	Spring
463	232	2014-05-29	2014	4	0	0	0	110.5	NA	NA	NA	ScienceComplex	Conventional 2013-2015	Spring
464	232	2014-05-29	2014	4	0	0	0	35.1	NA	NA	NA	Annex	Ornilux 2013-2015	Spring
465	233	2014-05-30	2014	5	0	0	0	110.5	NA	NA	NA	ScienceComplex	Conventional 2013-2015	Spring
466	233	2014-05-30	2014	5	0	0	0	35.1	NA	NA	NA	Annex	Ornilux 2013-2015	Spring
467	234	2014-06-02	2014	5	0	0	0	110.5	NA	NA	NA	ScienceComplex	Conventional 2013-2015	Summer
468	234	2014-06-02	2014	5	0	0	0	35.1	NA	NA	NA	Annex	Ornilux 2013-2015	Summer
469	235	2014-06-03	2014	4	0	0	0	110.5	NA	NA	NA	ScienceComplex	Conventional 2013-2015	Summer
470	235	2014-06-03	2014	4	0	0	0	35.1	NA	NA	NA	Annex	Ornilux 2013-2015	Summer
471	236	2014-06-05	2014	4	0	0	0	110.5	NA	NA	NA	ScienceComplex	Conventional 2013-2015	Summer
472	236	2014-06-05	2014	4	0	0	0	35.1	NA	NA	NA	Annex	Ornilux 2013-2015	Summer
473	237	2014-06-11	2014	5	0	0	0	110.5	NA	NA	NA	ScienceComplex	Conventional 2013-2015	Summer
474	237	2014-06-11	2014	5	0	0	0	35.1	NA	NA	NA	Annex	Ornilux 2013-2015	Summer
475	238	2014-06-13	2014	5	0	0	0	110.5	NA	NA	NA	ScienceComplex	Conventional 2013-2015	Summer
476	238	2014-06-13	2014	5	0	0	0	35.1	NA	NA	NA	Annex	Ornilux 2013-2015	Summer
477	239	2014-06-16	2014	5	0	0	0	110.5	NA	NA	NA	ScienceComplex	Conventional 2013-2015	Summer
478	239	2014-06-16	2014	5	0	0	0	35.1	NA	NA	NA	Annex	Ornilux 2013-2015	Summer
479	240	2014-06-17	2014	13	0	0	0	110.5	NA	NA	NA	ScienceComplex	Conventional 2013-2015	Summer
480	240	2014-06-17	2014	13	0	0	0	35.1	NA	NA	NA	Annex	Ornilux 2013-2015	Summer
481	241	2014-06-18	2014	5	0	0	0	110.5	NA	NA	NA	ScienceComplex	Conventional 2013-2015	Summer
482	241	2014-06-18	2014	5	0	0	0	35.1	NA	NA	NA	Annex	Ornilux 2013-2015	Summer
483	242	2014-06-19	2014	13	0	0	0	110.5	NA	NA	NA	ScienceComplex	Conventional 2013-2015	Summer
484	242	2014-06-19	2014	13	0	0	0	35.1	NA	NA	NA	Annex	Ornilux 2013-2015	Summer
485	243	2014-06-24	2014	5	0	0	0	110.5	NA	NA	NA	ScienceComplex	Conventional 2013-2015	Summer
486	243	2014-06-24	2014	5	0	0	0	35.1	NA	NA	NA	Annex	Ornilux 2013-2015	Summer
487	244	2014-06-26	2014	5	0	0	0	110.5	NA	NA	NA	ScienceComplex	Conventional 2013-2015	Summer
488	244	2014-06-26	2014	5	0	0	0	35.1	NA	NA	NA	Annex	Ornilux 2013-2015	Summer
489	245	2014-07-02	2014	5	0	0	0	110.5	NA	NA	NA	ScienceComplex	Conventional 2013-2015	Summer
490	245	2014-07-02	2014	5	0	0	0	35.1	NA	NA	NA	Annex	Ornilux 2013-2015	Summer
491	246	2014-07-04	2014	6	0	0	0	110.5	NA	NA	NA	ScienceComplex	Conventional 2013-2015	Summer
492	246	2014-07-04	2014	6	0	0	0	35.1	NA	NA	NA	Annex	Ornilux 2013-2015	Summer
493	247	2014-07-07	2014	6	0	0	0	110.5	NA	NA	NA	ScienceComplex	Conventional 2013-2015	Summer
494	247	2014-07-07	2014	6	0	0	0	35.1	NA	NA	NA	Annex	Ornilux 2013-2015	Summer
495	248	2014-07-09	2014	6	0	0	0	110.5	NA	NA	NA	ScienceComplex	Conventional 2013-2015	Summer
496	248	2014-07-09	2014	6	0	0	0	35.1	NA	NA	NA	Annex	Ornilux 2013-2015	Summer
497	249	2014-07-10	2014	6	0	0	0	110.5	NA	NA	NA	ScienceComplex	Conventional 2013-2015	Summer
498	249	2014-07-10	2014	6	0	0	0	35.1	NA	NA	NA	Annex	Ornilux 2013-2015	Summer
499	250	2014-07-11	2014	6	0	0	0	110.5	NA	NA	NA	ScienceComplex	Conventional 2013-2015	Summer
500	250	2014-07-11	2014	6	0	0	0	35.1	NA	NA	NA	Annex	Ornilux 2013-2015	Summer
501	251	2014-07-14	2014	6	0	0	0	110.5	NA	NA	NA	ScienceComplex	Conventional 2013-2015	Summer
502	251	2014-07-14	2014	6	0	0	0	35.1	NA	NA	NA	Annex	Ornilux 2013-2015	Summer
503	252	2014-07-15	2014	24	0	0	0	110.5	NA	NA	NA	ScienceComplex	Conventional 2013-2015	Summer
504	252	2014-07-15	2014	24	0	0	0	35.1	NA	NA	NA	Annex	Ornilux 2013-2015	Summer
505	253	2014-07-16	2014	6	0	0	0	110.5	NA	NA	NA	ScienceComplex	Conventional 2013-2015	Summer
506	253	2014-07-16	2014	6	0	0	0	35.1	NA	NA	NA	Annex	Ornilux 2013-2015	Summer
507	254	2014-07-17	2014	6	0	0	0	110.5	NA	NA	NA	ScienceComplex	Conventional 2013-2015	Summer
508	254	2014-07-17	2014	6	0	0	0	35.1	NA	NA	NA	Annex	Ornilux 2013-2015	Summer
509	255	2014-07-18	2014	6	0	0	0	110.5	NA	NA	NA	ScienceComplex	Conventional 2013-2015	Summer
510	255	2014-07-18	2014	6	0	0	0	35.1	NA	NA	NA	Annex	Ornilux 2013-2015	Summer
511	256	2014-07-23	2014	3	0	0	0	110.5	NA	NA	NA	ScienceComplex	Conventional 2013-2015	Summer
512	256	2014-07-23	2014	3	0	0	0	35.1	NA	NA	NA	Annex	Ornilux 2013-2015	Summer
513	257	2014-07-25	2014	3	0	0	0	110.5	NA	NA	NA	ScienceComplex	Conventional 2013-2015	Summer
514	257	2014-07-25	2014	3	0	0	0	35.1	NA	NA	NA	Annex	Ornilux 2013-2015	Summer
515	258	2014-07-28	2014	6	0	0	0	110.5	NA	NA	NA	ScienceComplex	Conventional 2013-2015	Summer
516	258	2014-07-28	2014	6	0	0	0	35.1	NA	NA	NA	Annex	Ornilux 2013-2015	Summer
517	259	2014-07-29	2014	4	0	0	0	110.5	NA	NA	NA	ScienceComplex	Conventional 2013-2015	Summer
518	259	2014-07-29	2014	4	0	0	0	35.1	NA	NA	NA	Annex	Ornilux 2013-2015	Summer
519	260	2014-07-30	2014	6	0	0	0	110.5	NA	NA	NA	ScienceComplex	Conventional 2013-2015	Summer
520	260	2014-07-30	2014	6	0	0	0	35.1	NA	NA	NA	Annex	Ornilux 2013-2015	Summer
521	261	2014-07-31	2014	6	0	0	0	110.5	NA	NA	NA	ScienceComplex	Conventional 2013-2015	Summer
522	261	2014-07-31	2014	6	0	0	0	35.1	NA	NA	NA	Annex	Ornilux 2013-2015	Summer
523	262	2014-08-01	2014	6	0	0	0	110.5	NA	NA	NA	ScienceComplex	Conventional 2013-2015	Summer
524	262	2014-08-01	2014	6	0	0	0	35.1	NA	NA	NA	Annex	Ornilux 2013-2015	Summer
525	263	2014-08-05	2014	6	0	0	0	110.5	NA	NA	NA	ScienceComplex	Conventional 2013-2015	Summer
526	263	2014-08-05	2014	6	0	0	0	35.1	NA	NA	NA	Annex	Ornilux 2013-2015	Summer
527	264	2014-08-06	2014	6	0	0	0	110.5	NA	NA	NA	ScienceComplex	Conventional 2013-2015	Summer
528	264	2014-08-06	2014	6	0	0	0	35.1	NA	NA	NA	Annex	Ornilux 2013-2015	Summer
529	265	2014-08-07	2014	6	0	0	0	110.5	NA	NA	NA	ScienceComplex	Conventional 2013-2015	Summer
530	265	2014-08-07	2014	6	0	0	0	35.1	NA	NA	NA	Annex	Ornilux 2013-2015	Summer
531	266	2014-08-08	2014	6	0	0	0	110.5	NA	NA	NA	ScienceComplex	Conventional 2013-2015	Summer
532	266	2014-08-08	2014	6	0	0	0	35.1	NA	NA	NA	Annex	Ornilux 2013-2015	Summer
533	267	2014-08-11	2014	6	0	0	0	110.5	NA	NA	NA	ScienceComplex	Conventional 2013-2015	Summer
534	267	2014-08-11	2014	6	0	0	0	35.1	NA	NA	NA	Annex	Ornilux 2013-2015	Summer
535	268	2014-08-12	2014	6	0	0	0	110.5	NA	NA	NA	ScienceComplex	Conventional 2013-2015	Summer
536	268	2014-08-12	2014	6	0	0	0	35.1	NA	NA	NA	Annex	Ornilux 2013-2015	Summer
537	269	2014-08-13	2014	6	0	0	0	110.5	NA	NA	NA	ScienceComplex	Conventional 2013-2015	Summer
538	269	2014-08-13	2014	6	0	0	0	35.1	NA	NA	NA	Annex	Ornilux 2013-2015	Summer
539	270	2014-08-14	2014	6	0	0	0	110.5	NA	NA	NA	ScienceComplex	Conventional 2013-2015	Summer
540	270	2014-08-14	2014	6	0	0	0	35.1	NA	NA	NA	Annex	Ornilux 2013-2015	Summer
541	271	2014-08-15	2014	6	0	0	0	110.5	NA	NA	NA	ScienceComplex	Conventional 2013-2015	Summer
542	271	2014-08-15	2014	6	0	0	0	35.1	NA	NA	NA	Annex	Ornilux 2013-2015	Summer
543	272	2014-08-18	2014	6	0	0	0	110.5	NA	NA	NA	ScienceComplex	Conventional 2013-2015	Summer
544	272	2014-08-18	2014	6	0	0	0	35.1	NA	NA	NA	Annex	Ornilux 2013-2015	Summer
545	273	2014-08-19	2014	6	0	0	0	110.5	NA	NA	NA	ScienceComplex	Conventional 2013-2015	Summer
546	273	2014-08-19	2014	6	0	0	0	35.1	NA	NA	NA	Annex	Ornilux 2013-2015	Summer
547	274	2014-08-20	2014	6	0	0	0	110.5	NA	NA	NA	ScienceComplex	Conventional 2013-2015	Summer
548	274	2014-08-20	2014	6	0	0	0	35.1	NA	NA	NA	Annex	Ornilux 2013-2015	Summer
549	275	2014-08-21	2014	6	0	0	0	110.5	NA	NA	NA	ScienceComplex	Conventional 2013-2015	Summer
550	275	2014-08-21	2014	6	0	0	0	35.1	NA	NA	NA	Annex	Ornilux 2013-2015	Summer
15	8	2014-08-26	2014	6	1	0	1	110.5	WAVI	JUV	b1.9	ScienceComplex	Conventional 2013-2015	Summer
16	8	2014-08-26	2014	6	0	0	0	35.1	NA	NA	NA	Annex	Ornilux 2013-2015	Summer
551	276	2014-08-27	2014	6	0	0	0	110.5	NA	NA	NA	ScienceComplex	Conventional 2013-2015	Summer
552	276	2014-08-27	2014	6	0	0	0	35.1	NA	NA	NA	Annex	Ornilux 2013-2015	Summer
553	277	2014-08-28	2014	25	0	0	0	110.5	NA	NA	NA	ScienceComplex	Conventional 2013-2015	Summer
554	277	2014-08-28	2014	25	0	0	0	35.1	NA	NA	NA	Annex	Ornilux 2013-2015	Summer
555	278	2014-09-02	2014	4	0	0	0	110.5	NA	NA	NA	ScienceComplex	Conventional 2013-2015	Fall
556	278	2014-09-02	2014	4	0	0	0	35.1	NA	NA	NA	Annex	Ornilux 2013-2015	Fall
557	279	2014-09-04	2014	4	0	0	0	110.5	NA	NA	NA	ScienceComplex	Conventional 2013-2015	Fall
558	279	2014-09-04	2014	4	0	0	0	35.1	NA	NA	NA	Annex	Ornilux 2013-2015	Fall
559	280	2014-09-09	2014	4	0	0	0	110.5	NA	NA	NA	ScienceComplex	Conventional 2013-2015	Fall
560	280	2014-09-09	2014	4	0	0	0	35.1	NA	NA	NA	Annex	Ornilux 2013-2015	Fall
561	281	2014-09-11	2014	4	0	1	1	110.5	UNID	UK	b1.9	ScienceComplex	Conventional 2013-2015	Fall
562	281	2014-09-11	2014	4	0	0	0	35.1	NA	NA	NA	Annex	Ornilux 2013-2015	Fall
563	282	2014-09-16	2014	4	0	0	0	110.5	NA	NA	NA	ScienceComplex	Conventional 2013-2015	Fall
564	282	2014-09-16	2014	4	0	0	0	35.1	NA	NA	NA	Annex	Ornilux 2013-2015	Fall
565	283	2014-09-17	2014	3	0	0	0	110.5	NA	NA	NA	ScienceComplex	Conventional 2013-2015	Fall
566	283	2014-09-17	2014	3	0	0	0	35.1	NA	NA	NA	Annex	Ornilux 2013-2015	Fall
567	284	2014-09-18	2014	4	0	0	0	110.5	NA	NA	NA	ScienceComplex	Conventional 2013-2015	Fall
568	284	2014-09-18	2014	4	0	0	0	35.1	NA	NA	NA	Annex	Ornilux 2013-2015	Fall
569	285	2014-09-19	2014	3	0	0	0	110.5	NA	NA	NA	ScienceComplex	Conventional 2013-2015	Fall
570	285	2014-09-19	2014	3	0	0	0	35.1	NA	NA	NA	Annex	Ornilux 2013-2015	Fall
571	286	2014-09-22	2014	26	0	0	0	110.5	NA	NA	NA	ScienceComplex	Conventional 2013-2015	Fall
572	286	2014-09-22	2014	26	0	0	0	35.1	NA	NA	NA	Annex	Ornilux 2013-2015	Fall
573	287	2014-09-23	2014	4	0	1	1	110.5	UNID	UK	b1.8	ScienceComplex	Conventional 2013-2015	Fall
574	287	2014-09-23	2014	4	0	0	0	35.1	NA	NA	NA	Annex	Ornilux 2013-2015	Fall
575	288	2014-09-25	2014	4	0	0	0	110.5	NA	NA	NA	ScienceComplex	Conventional 2013-2015	Fall
576	288	2014-09-25	2014	4	0	0	0	35.1	NA	NA	NA	Annex	Ornilux 2013-2015	Fall
577	289	2014-09-30	2014	4	0	0	0	110.5	NA	NA	NA	ScienceComplex	Conventional 2013-2015	Fall
578	289	2014-09-30	2014	4	0	0	0	35.1	NA	NA	NA	Annex	Ornilux 2013-2015	Fall
579	290	2014-10-01	2014	3	0	0	0	110.5	NA	NA	NA	ScienceComplex	Conventional 2013-2015	Fall
580	290	2014-10-01	2014	3	0	0	0	35.1	NA	NA	NA	Annex	Ornilux 2013-2015	Fall
581	291	2014-10-02	2014	4	0	2	2	110.5	UNID	UK	b1.8	ScienceComplex	Conventional 2013-2015	Fall
582	291	2014-10-02	2014	4	0	0	0	35.1	NA	NA	NA	Annex	Ornilux 2013-2015	Fall
583	292	2014-10-03	2014	3	0	0	0	110.5	NA	NA	NA	ScienceComplex	Conventional 2013-2015	Fall
584	292	2014-10-03	2014	3	0	0	0	35.1	NA	NA	NA	Annex	Ornilux 2013-2015	Fall
585	293	2014-10-06	2014	26	0	0	0	110.5	NA	NA	NA	ScienceComplex	Conventional 2013-2015	Fall
586	293	2014-10-06	2014	26	0	0	0	35.1	NA	NA	NA	Annex	Ornilux 2013-2015	Fall
587	294	2014-10-08	2014	26	0	0	0	110.5	NA	NA	NA	ScienceComplex	Conventional 2013-2015	Fall
588	294	2014-10-08	2014	26	0	0	0	35.1	NA	NA	NA	Annex	Ornilux 2013-2015	Fall
589	295	2014-10-14	2014	4	0	0	0	110.5	NA	NA	NA	ScienceComplex	Conventional 2013-2015	Fall
590	295	2014-10-14	2014	4	0	0	0	35.1	NA	NA	NA	Annex	Ornilux 2013-2015	Fall
591	296	2014-10-20	2014	26	0	0	0	110.5	NA	NA	NA	ScienceComplex	Conventional 2013-2015	Fall
592	296	2014-10-20	2014	26	0	0	0	35.1	NA	NA	NA	Annex	Ornilux 2013-2015	Fall
593	297	2014-10-21	2014	4	0	0	0	110.5	NA	NA	NA	ScienceComplex	Conventional 2013-2015	Fall
594	297	2014-10-21	2014	4	0	0	0	35.1	NA	NA	NA	Annex	Ornilux 2013-2015	Fall
595	298	2014-10-27	2014	26	0	0	0	110.5	NA	NA	NA	ScienceComplex	Conventional 2013-2015	Fall
596	298	2014-10-27	2014	26	0	0	0	35.1	NA	NA	NA	Annex	Ornilux 2013-2015	Fall
597	299	2014-10-28	2014	26	0	0	0	110.5	NA	NA	NA	ScienceComplex	Conventional 2013-2015	Fall
598	299	2014-10-28	2014	26	0	0	0	35.1	NA	NA	NA	Annex	Ornilux 2013-2015	Fall
599	300	2014-10-29	2014	26	0	0	0	110.5	NA	NA	NA	ScienceComplex	Conventional 2013-2015	Fall
600	300	2014-10-29	2014	26	0	0	0	35.1	NA	NA	NA	Annex	Ornilux 2013-2015	Fall
601	301	2014-10-30	2014	4	0	0	0	110.5	NA	NA	NA	ScienceComplex	Conventional 2013-2015	Fall
602	301	2014-10-30	2014	4	0	0	0	35.1	NA	NA	NA	Annex	Ornilux 2013-2015	Fall
603	302	2014-10-31	2014	3	0	0	0	110.5	NA	NA	NA	ScienceComplex	Conventional 2013-2015	Fall
604	302	2014-10-31	2014	3	0	0	0	35.1	NA	NA	NA	Annex	Ornilux 2013-2015	Fall
605	303	2014-11-03	2014	26	0	0	0	110.5	NA	NA	NA	ScienceComplex	Conventional 2013-2015	Fall
606	303	2014-11-03	2014	26	0	0	0	35.1	NA	NA	NA	Annex	Ornilux 2013-2015	Fall
607	304	2014-11-04	2014	4	0	0	0	110.5	NA	NA	NA	ScienceComplex	Conventional 2013-2015	Fall
608	304	2014-11-04	2014	4	0	0	0	35.1	NA	NA	NA	Annex	Ornilux 2013-2015	Fall
609	305	2014-11-05	2014	3	0	0	0	110.5	NA	NA	NA	ScienceComplex	Conventional 2013-2015	Fall
610	305	2014-11-05	2014	3	0	0	0	35.1	NA	NA	NA	Annex	Ornilux 2013-2015	Fall
611	306	2014-11-06	2014	3	0	0	0	110.5	NA	NA	NA	ScienceComplex	Conventional 2013-2015	Fall
612	306	2014-11-06	2014	3	0	0	0	35.1	NA	NA	NA	Annex	Ornilux 2013-2015	Fall
613	307	2014-11-07	2014	3	0	0	0	110.5	NA	NA	NA	ScienceComplex	Conventional 2013-2015	Fall
614	307	2014-11-07	2014	3	0	0	0	35.1	NA	NA	NA	Annex	Ornilux 2013-2015	Fall
615	308	2014-11-12	2014	26	0	0	0	110.5	NA	NA	NA	ScienceComplex	Conventional 2013-2015	Fall
616	308	2014-11-12	2014	26	0	0	0	35.1	NA	NA	NA	Annex	Ornilux 2013-2015	Fall
617	309	2014-11-13	2014	26	0	0	0	110.5	NA	NA	NA	ScienceComplex	Conventional 2013-2015	Fall
618	309	2014-11-13	2014	26	0	0	0	35.1	NA	NA	NA	Annex	Ornilux 2013-2015	Fall
619	310	2014-11-14	2014	3	0	0	0	110.5	NA	NA	NA	ScienceComplex	Conventional 2013-2015	Fall
620	310	2014-11-14	2014	3	0	0	0	35.1	NA	NA	NA	Annex	Ornilux 2013-2015	Fall
621	311	2014-11-18	2014	4	0	1	1	110.5	UNID	UK	b1.7	ScienceComplex	Conventional 2013-2015	Fall
622	311	2014-11-18	2014	4	0	0	0	35.1	NA	NA	NA	Annex	Ornilux 2013-2015	Fall
623	312	2014-11-21	2014	3	0	0	0	110.5	NA	NA	NA	ScienceComplex	Conventional 2013-2015	Fall
624	312	2014-11-21	2014	3	0	0	0	35.1	NA	NA	NA	Annex	Ornilux 2013-2015	Fall
625	313	2014-11-24	2014	26	0	0	0	110.5	NA	NA	NA	ScienceComplex	Conventional 2013-2015	Fall
626	313	2014-11-24	2014	26	0	0	0	35.1	NA	NA	NA	Annex	Ornilux 2013-2015	Fall
627	314	2014-11-25	2014	4	0	0	0	110.5	NA	NA	NA	ScienceComplex	Conventional 2013-2015	Fall
628	314	2014-11-25	2014	4	0	0	0	35.1	NA	NA	NA	Annex	Ornilux 2013-2015	Fall
630	315	2014-11-26	2014	27	0	0	0	110.5	NA	NA	NA	ScienceComplex	Conventional 2013-2015	Fall
629	315	2014-11-26	2014	27	0	0	0	35.1	NA	NA	NA	Annex	Ornilux 2013-2015	Fall
631	316	2014-11-27	2014	26	0	1	1	110.5	UNID	UK	b1.11	ScienceComplex	Conventional 2013-2015	Fall
632	316	2014-11-27	2014	26	0	0	0	35.1	NA	NA	NA	Annex	Ornilux 2013-2015	Fall
633	317	2014-12-03	2014	26	0	0	0	110.5	NA	NA	NA	ScienceComplex	Conventional 2013-2015	Winter
634	317	2014-12-03	2014	26	0	0	0	35.1	NA	NA	NA	Annex	Ornilux 2013-2015	Winter
635	318	2014-12-04	2014	4	0	0	0	110.5	NA	NA	NA	ScienceComplex	Conventional 2013-2015	Winter
636	318	2014-12-04	2014	4	0	0	0	35.1	NA	NA	NA	Annex	Ornilux 2013-2015	Winter
637	319	2014-12-05	2014	3	0	0	0	110.5	NA	NA	NA	ScienceComplex	Conventional 2013-2015	Winter
638	319	2014-12-05	2014	3	0	0	0	35.1	NA	NA	NA	Annex	Ornilux 2013-2015	Winter
639	320	2014-12-08	2014	26	0	0	0	110.5	NA	NA	NA	ScienceComplex	Conventional 2013-2015	Winter
640	320	2014-12-08	2014	26	0	0	0	35.1	NA	NA	NA	Annex	Ornilux 2013-2015	Winter
641	321	2014-12-09	2014	4	0	0	0	110.5	NA	NA	NA	ScienceComplex	Conventional 2013-2015	Winter
642	321	2014-12-09	2014	4	0	0	0	35.1	NA	NA	NA	Annex	Ornilux 2013-2015	Winter
643	322	2014-12-16	2014	4	0	0	0	110.5	NA	NA	NA	ScienceComplex	Conventional 2013-2015	Winter
644	322	2014-12-16	2014	4	0	0	0	35.1	NA	NA	NA	Annex	Ornilux 2013-2015	Winter
645	323	2014-12-17	2014	3	0	0	0	110.5	NA	NA	NA	ScienceComplex	Conventional 2013-2015	Winter
646	323	2014-12-17	2014	3	0	0	0	35.1	NA	NA	NA	Annex	Ornilux 2013-2015	Winter
647	324	2014-12-18	2014	26	0	0	0	110.5	NA	NA	NA	ScienceComplex	Conventional 2013-2015	Winter
648	324	2014-12-18	2014	26	0	0	0	35.1	NA	NA	NA	Annex	Ornilux 2013-2015	Winter
649	325	2014-12-19	2014	3	0	0	0	110.5	NA	NA	NA	ScienceComplex	Conventional 2013-2015	Winter
650	325	2014-12-19	2014	3	0	0	0	35.1	NA	NA	NA	Annex	Ornilux 2013-2015	Winter
651	326	2014-12-23	2014	3	0	0	0	110.5	NA	NA	NA	ScienceComplex	Conventional 2013-2015	Winter
652	326	2014-12-23	2014	3	0	0	0	35.1	NA	NA	NA	Annex	Ornilux 2013-2015	Winter
653	327	2014-12-24	2014	3	0	0	0	110.5	NA	NA	NA	ScienceComplex	Conventional 2013-2015	Winter
654	327	2014-12-24	2014	3	0	0	0	35.1	NA	NA	NA	Annex	Ornilux 2013-2015	Winter
655	328	2015-01-05	2015	26	0	1	1	110.5	DEJU	UK	b1.6	ScienceComplex	Conventional 2013-2015	Winter
656	328	2015-01-05	2015	26	0	0	0	35.1	NA	NA	NA	Annex	Ornilux 2013-2015	Winter
657	329	2015-01-06	2015	26	0	1	1	110.5	UNID	UK	b1.7	ScienceComplex	Conventional 2013-2015	Winter
658	329	2015-01-06	2015	26	0	0	0	35.1	NA	NA	NA	Annex	Ornilux 2013-2015	Winter
659	330	2015-01-08	2015	4	0	0	0	110.5	NA	NA	NA	ScienceComplex	Conventional 2013-2015	Winter
660	330	2015-01-08	2015	4	0	0	0	35.1	NA	NA	NA	Annex	Ornilux 2013-2015	Winter
661	331	2015-01-09	2015	3	0	0	0	110.5	NA	NA	NA	ScienceComplex	Conventional 2013-2015	Winter
662	331	2015-01-09	2015	3	0	0	0	35.1	NA	NA	NA	Annex	Ornilux 2013-2015	Winter
663	332	2015-01-12	2015	18	0	0	0	110.5	NA	NA	NA	ScienceComplex	Conventional 2013-2015	Winter
664	332	2015-01-12	2015	18	0	0	0	35.1	NA	NA	NA	Annex	Ornilux 2013-2015	Winter
665	333	2015-01-13	2015	4	0	0	0	110.5	NA	NA	NA	ScienceComplex	Conventional 2013-2015	Winter
666	333	2015-01-13	2015	4	0	0	0	35.1	NA	NA	NA	Annex	Ornilux 2013-2015	Winter
667	334	2015-01-15	2015	4	0	0	0	110.5	NA	NA	NA	ScienceComplex	Conventional 2013-2015	Winter
668	334	2015-01-15	2015	4	0	0	0	35.1	NA	NA	NA	Annex	Ornilux 2013-2015	Winter
669	335	2015-01-16	2015	3	0	0	0	110.5	NA	NA	NA	ScienceComplex	Conventional 2013-2015	Winter
670	335	2015-01-16	2015	3	0	0	0	35.1	NA	NA	NA	Annex	Ornilux 2013-2015	Winter
671	336	2015-01-22	2015	26	0	1	1	110.5	UNID	UK	b1.8	ScienceComplex	Conventional 2013-2015	Winter
672	336	2015-01-22	2015	26	0	0	0	35.1	NA	NA	NA	Annex	Ornilux 2013-2015	Winter
673	337	2015-01-27	2015	3	0	0	0	110.5	NA	NA	NA	ScienceComplex	Conventional 2013-2015	Winter
674	337	2015-01-27	2015	3	0	0	0	35.1	NA	NA	NA	Annex	Ornilux 2013-2015	Winter
675	338	2015-01-29	2015	3	0	0	0	110.5	NA	NA	NA	ScienceComplex	Conventional 2013-2015	Winter
676	338	2015-01-29	2015	3	0	0	0	35.1	NA	NA	NA	Annex	Ornilux 2013-2015	Winter
677	339	2015-01-30	2015	3	0	0	0	110.5	NA	NA	NA	ScienceComplex	Conventional 2013-2015	Winter
678	339	2015-01-30	2015	3	0	0	0	35.1	NA	NA	NA	Annex	Ornilux 2013-2015	Winter
679	340	2015-02-02	2015	26	0	0	0	110.5	NA	NA	NA	ScienceComplex	Conventional 2013-2015	Winter
680	340	2015-02-02	2015	26	0	0	0	35.1	NA	NA	NA	Annex	Ornilux 2013-2015	Winter
681	341	2015-02-04	2015	3	0	0	0	110.5	NA	NA	NA	ScienceComplex	Conventional 2013-2015	Winter
682	341	2015-02-04	2015	3	0	0	0	35.1	NA	NA	NA	Annex	Ornilux 2013-2015	Winter
683	342	2015-02-10	2015	4	0	3	3	110.5	UNID	UK	b1.8	ScienceComplex	Conventional 2013-2015	Winter
684	342	2015-02-10	2015	4	0	0	0	35.1	NA	NA	NA	Annex	Ornilux 2013-2015	Winter
685	343	2015-02-11	2015	3	0	0	0	110.5	NA	NA	NA	ScienceComplex	Conventional 2013-2015	Winter
686	343	2015-02-11	2015	3	0	0	0	35.1	NA	NA	NA	Annex	Ornilux 2013-2015	Winter
687	344	2015-02-12	2015	3	0	0	0	110.5	NA	NA	NA	ScienceComplex	Conventional 2013-2015	Winter
688	344	2015-02-12	2015	3	0	0	0	35.1	NA	NA	NA	Annex	Ornilux 2013-2015	Winter
689	345	2015-02-13	2015	26	0	0	0	110.5	NA	NA	NA	ScienceComplex	Conventional 2013-2015	Winter
690	345	2015-02-13	2015	26	0	0	0	35.1	NA	NA	NA	Annex	Ornilux 2013-2015	Winter
691	346	2015-02-16	2015	26	0	0	0	110.5	NA	NA	NA	ScienceComplex	Conventional 2013-2015	Winter
692	346	2015-02-16	2015	26	0	1	1	35.1	UNID	UK	b2.2	Annex	Ornilux 2013-2015	Winter
693	347	2015-02-19	2015	26	0	0	0	110.5	NA	NA	NA	ScienceComplex	Conventional 2013-2015	Winter
694	347	2015-02-19	2015	26	0	0	0	35.1	NA	NA	NA	Annex	Ornilux 2013-2015	Winter
695	348	2015-02-20	2015	26	0	0	0	110.5	NA	NA	NA	ScienceComplex	Conventional 2013-2015	Winter
696	348	2015-02-20	2015	26	0	0	0	35.1	NA	NA	NA	Annex	Ornilux 2013-2015	Winter
697	349	2015-02-24	2015	26	0	0	0	110.5	NA	NA	NA	ScienceComplex	Conventional 2013-2015	Winter
698	349	2015-02-24	2015	26	0	0	0	35.1	NA	NA	NA	Annex	Ornilux 2013-2015	Winter
17	9	2015-02-26	2015	3	1	0	1	110.5	FOSP	ASY	b1.5	ScienceComplex	Conventional 2013-2015	Winter
18	9	2015-02-26	2015	3	0	0	0	35.1	NA	NA	NA	Annex	Ornilux 2013-2015	Winter
699	350	2015-03-04	2015	26	0	0	0	110.5	NA	NA	NA	ScienceComplex	Conventional 2013-2015	Spring
700	350	2015-03-04	2015	26	0	0	0	35.1	NA	NA	NA	Annex	Ornilux 2013-2015	Spring
701	351	2015-03-06	2015	26	0	0	0	110.5	NA	NA	NA	ScienceComplex	Conventional 2013-2015	Spring
702	351	2015-03-06	2015	26	0	0	0	35.1	NA	NA	NA	Annex	Ornilux 2013-2015	Spring
703	352	2015-03-10	2015	26	0	0	0	110.5	NA	NA	NA	ScienceComplex	Conventional 2013-2015	Spring
704	352	2015-03-10	2015	26	0	0	0	35.1	NA	NA	NA	Annex	Ornilux 2013-2015	Spring
705	353	2015-03-12	2015	26	0	0	0	110.5	NA	NA	NA	ScienceComplex	Conventional 2013-2015	Spring
706	353	2015-03-12	2015	26	0	0	0	35.1	NA	NA	NA	Annex	Ornilux 2013-2015	Spring
707	354	2015-03-13	2015	26	0	0	0	110.5	NA	NA	NA	ScienceComplex	Conventional 2013-2015	Spring
708	354	2015-03-13	2015	26	0	0	0	35.1	NA	NA	NA	Annex	Ornilux 2013-2015	Spring
709	355	2015-03-16	2015	26	0	0	0	110.5	NA	NA	NA	ScienceComplex	Conventional 2013-2015	Spring
710	355	2015-03-16	2015	26	0	0	0	35.1	NA	NA	NA	Annex	Ornilux 2013-2015	Spring
711	356	2015-03-23	2015	26	0	0	0	110.5	NA	NA	NA	ScienceComplex	Conventional 2013-2015	Spring
712	356	2015-03-23	2015	26	0	0	0	35.1	NA	NA	NA	Annex	Ornilux 2013-2015	Spring
713	357	2015-03-25	2015	3	0	0	0	110.5	NA	NA	NA	ScienceComplex	Conventional 2013-2015	Spring
714	357	2015-03-25	2015	3	0	0	0	35.1	NA	NA	NA	Annex	Ornilux 2013-2015	Spring
715	358	2015-03-26	2015	3	0	0	0	110.5	NA	NA	NA	ScienceComplex	Conventional 2013-2015	Spring
716	358	2015-03-26	2015	3	0	0	0	35.1	NA	NA	NA	Annex	Ornilux 2013-2015	Spring
717	359	2015-03-27	2015	26	0	0	0	110.5	NA	NA	NA	ScienceComplex	Conventional 2013-2015	Spring
718	359	2015-03-27	2015	26	0	0	0	35.1	NA	NA	NA	Annex	Ornilux 2013-2015	Spring
719	360	2015-03-30	2015	26	0	0	0	110.5	NA	NA	NA	ScienceComplex	Conventional 2013-2015	Spring
720	360	2015-03-30	2015	26	0	0	0	35.1	NA	NA	NA	Annex	Ornilux 2013-2015	Spring
721	361	2015-04-01	2015	3	0	0	0	110.5	NA	NA	NA	ScienceComplex	Conventional 2013-2015	Spring
722	361	2015-04-01	2015	3	0	0	0	35.1	NA	NA	NA	Annex	Ornilux 2013-2015	Spring
723	362	2015-04-02	2015	3	0	0	0	110.5	NA	NA	NA	ScienceComplex	Conventional 2013-2015	Spring
724	362	2015-04-02	2015	3	0	0	0	35.1	NA	NA	NA	Annex	Ornilux 2013-2015	Spring
725	363	2016-09-26	2016	28	0	0	0	110.5	NA	NA	NA	ScienceComplex	FF 2016-2018	Fall
726	363	2016-09-26	2016	28	0	0	0	35.1	NA	NA	NA	Annex	Ornilux 2016-2018	Fall
727	364	2016-09-27	2016	4	0	0	0	110.5	NA	NA	NA	ScienceComplex	FF 2016-2018	Fall
728	364	2016-09-27	2016	4	0	0	0	35.1	NA	NA	NA	Annex	Ornilux 2016-2018	Fall
729	365	2016-09-28	2016	29	0	0	0	110.5	NA	NA	NA	ScienceComplex	FF 2016-2018	Fall
730	365	2016-09-28	2016	29	0	0	0	35.1	NA	NA	NA	Annex	Ornilux 2016-2018	Fall
731	366	2016-09-29	2016	30	0	0	0	110.5	NA	NA	NA	ScienceComplex	FF 2016-2018	Fall
732	366	2016-09-29	2016	30	0	0	0	35.1	NA	NA	NA	Annex	Ornilux 2016-2018	Fall
733	367	2016-09-30	2016	31	0	0	0	110.5	NA	NA	NA	ScienceComplex	FF 2016-2018	Fall
734	367	2016-09-30	2016	31	0	0	0	35.1	NA	NA	NA	Annex	Ornilux 2016-2018	Fall
735	368	2016-10-03	2016	31	0	0	0	110.5	NA	NA	NA	ScienceComplex	FF 2016-2018	Fall
736	368	2016-10-03	2016	31	0	0	0	35.1	NA	NA	NA	Annex	Ornilux 2016-2018	Fall
737	369	2016-10-04	2016	4	0	0	0	110.5	NA	NA	NA	ScienceComplex	FF 2016-2018	Fall
738	369	2016-10-04	2016	4	0	0	0	35.1	NA	NA	NA	Annex	Ornilux 2016-2018	Fall
739	370	2016-10-05	2016	29	0	0	0	110.5	NA	NA	NA	ScienceComplex	FF 2016-2018	Fall
740	370	2016-10-05	2016	29	0	0	0	35.1	NA	NA	NA	Annex	Ornilux 2016-2018	Fall
741	371	2016-10-06	2016	30	0	0	0	110.5	NA	NA	NA	ScienceComplex	FF 2016-2018	Fall
742	371	2016-10-06	2016	30	0	0	0	35.1	NA	NA	NA	Annex	Ornilux 2016-2018	Fall
743	372	2016-10-11	2016	4	0	0	0	110.5	NA	NA	NA	ScienceComplex	FF 2016-2018	Fall
744	372	2016-10-11	2016	4	0	0	0	35.1	NA	NA	NA	Annex	Ornilux 2016-2018	Fall
745	373	2016-10-13	2016	30	0	0	0	110.5	NA	NA	NA	ScienceComplex	FF 2016-2018	Fall
746	373	2016-10-13	2016	30	0	0	0	35.1	NA	NA	NA	Annex	Ornilux 2016-2018	Fall
747	374	2016-10-17	2016	28	0	0	0	110.5	NA	NA	NA	ScienceComplex	FF 2016-2018	Fall
748	374	2016-10-17	2016	28	0	0	0	35.1	NA	NA	NA	Annex	Ornilux 2016-2018	Fall
749	375	2016-10-18	2016	4	0	0	0	110.5	NA	NA	NA	ScienceComplex	FF 2016-2018	Fall
750	375	2016-10-18	2016	4	0	0	0	35.1	NA	NA	NA	Annex	Ornilux 2016-2018	Fall
751	376	2016-10-19	2016	31	0	0	0	110.5	NA	NA	NA	ScienceComplex	FF 2016-2018	Fall
752	376	2016-10-19	2016	31	0	0	0	35.1	NA	NA	NA	Annex	Ornilux 2016-2018	Fall
753	377	2016-10-20	2016	28	0	0	0	110.5	NA	NA	NA	ScienceComplex	FF 2016-2018	Fall
754	377	2016-10-20	2016	28	0	0	0	35.1	NA	NA	NA	Annex	Ornilux 2016-2018	Fall
755	378	2016-10-24	2016	30	0	0	0	110.5	NA	NA	NA	ScienceComplex	FF 2016-2018	Fall
756	378	2016-10-24	2016	30	0	0	0	35.1	NA	NA	NA	Annex	Ornilux 2016-2018	Fall
757	379	2016-10-25	2016	4	0	0	0	110.5	NA	NA	NA	ScienceComplex	FF 2016-2018	Fall
758	379	2016-10-25	2016	4	0	0	0	35.1	NA	NA	NA	Annex	Ornilux 2016-2018	Fall
759	380	2016-10-26	2016	31	0	0	0	110.5	NA	NA	NA	ScienceComplex	FF 2016-2018	Fall
760	380	2016-10-26	2016	31	0	0	0	35.1	NA	NA	NA	Annex	Ornilux 2016-2018	Fall
761	381	2016-10-27	2016	29	0	0	0	110.5	NA	NA	NA	ScienceComplex	FF 2016-2018	Fall
762	381	2016-10-27	2016	29	0	0	0	35.1	NA	NA	NA	Annex	Ornilux 2016-2018	Fall
763	382	2016-10-31	2016	28	0	0	0	110.5	NA	NA	NA	ScienceComplex	FF 2016-2018	Fall
764	382	2016-10-31	2016	28	0	0	0	35.1	NA	NA	NA	Annex	Ornilux 2016-2018	Fall
765	383	2016-11-01	2016	4	0	0	0	110.5	NA	NA	NA	ScienceComplex	FF 2016-2018	Fall
766	383	2016-11-01	2016	4	0	0	0	35.1	NA	NA	NA	Annex	Ornilux 2016-2018	Fall
767	384	2016-11-02	2016	31	0	0	0	110.5	NA	NA	NA	ScienceComplex	FF 2016-2018	Fall
768	384	2016-11-02	2016	31	0	0	0	35.1	NA	NA	NA	Annex	Ornilux 2016-2018	Fall
769	385	2016-11-03	2016	30	0	0	0	110.5	NA	NA	NA	ScienceComplex	FF 2016-2018	Fall
770	385	2016-11-03	2016	30	0	0	0	35.1	NA	NA	NA	Annex	Ornilux 2016-2018	Fall
771	386	2016-11-07	2016	28	0	0	0	110.5	NA	NA	NA	ScienceComplex	FF 2016-2018	Fall
772	386	2016-11-07	2016	28	0	0	0	35.1	NA	NA	NA	Annex	Ornilux 2016-2018	Fall
773	387	2016-11-08	2016	4	0	0	0	110.5	NA	NA	NA	ScienceComplex	FF 2016-2018	Fall
774	387	2016-11-08	2016	4	0	0	0	35.1	NA	NA	NA	Annex	Ornilux 2016-2018	Fall
775	388	2016-11-09	2016	31	0	0	0	110.5	NA	NA	NA	ScienceComplex	FF 2016-2018	Fall
776	388	2016-11-09	2016	31	0	0	0	35.1	NA	NA	NA	Annex	Ornilux 2016-2018	Fall
777	389	2016-11-10	2016	30	0	0	0	110.5	NA	NA	NA	ScienceComplex	FF 2016-2018	Fall
778	389	2016-11-10	2016	30	0	0	0	35.1	NA	NA	NA	Annex	Ornilux 2016-2018	Fall
779	390	2016-11-14	2016	28	0	0	0	110.5	NA	NA	NA	ScienceComplex	FF 2016-2018	Fall
780	390	2016-11-14	2016	28	0	0	0	35.1	NA	NA	NA	Annex	Ornilux 2016-2018	Fall
781	391	2016-11-15	2016	4	0	0	0	110.5	NA	NA	NA	ScienceComplex	FF 2016-2018	Fall
782	391	2016-11-15	2016	4	0	0	0	35.1	NA	NA	NA	Annex	Ornilux 2016-2018	Fall
783	392	2016-11-17	2016	30	0	0	0	110.5	NA	NA	NA	ScienceComplex	FF 2016-2018	Fall
784	392	2016-11-17	2016	30	0	0	0	35.1	NA	NA	NA	Annex	Ornilux 2016-2018	Fall
785	393	2016-11-21	2016	28	0	0	0	110.5	NA	NA	NA	ScienceComplex	FF 2016-2018	Fall
786	393	2016-11-21	2016	28	0	0	0	35.1	NA	NA	NA	Annex	Ornilux 2016-2018	Fall
787	394	2016-11-22	2016	4	0	0	0	110.5	NA	NA	NA	ScienceComplex	FF 2016-2018	Fall
788	394	2016-11-22	2016	4	0	0	0	35.1	NA	NA	NA	Annex	Ornilux 2016-2018	Fall
789	395	2016-11-23	2016	32	0	0	0	110.5	NA	NA	NA	ScienceComplex	FF 2016-2018	Fall
790	395	2016-11-23	2016	32	1	0	1	35.1	UNID	UK	b2.2	Annex	Ornilux 2016-2018	Fall
791	396	2016-11-24	2016	30	0	0	0	110.5	NA	NA	NA	ScienceComplex	FF 2016-2018	Fall
792	396	2016-11-24	2016	30	0	0	0	35.1	NA	NA	NA	Annex	Ornilux 2016-2018	Fall
793	397	2016-11-28	2016	28	0	0	0	110.5	NA	NA	NA	ScienceComplex	FF 2016-2018	Fall
794	397	2016-11-28	2016	28	0	0	0	35.1	NA	NA	NA	Annex	Ornilux 2016-2018	Fall
795	398	2016-11-29	2016	4	0	0	0	110.5	NA	NA	NA	ScienceComplex	FF 2016-2018	Fall
796	398	2016-11-29	2016	4	0	0	0	35.1	NA	NA	NA	Annex	Ornilux 2016-2018	Fall
797	399	2016-11-30	2016	31	0	0	0	110.5	NA	NA	NA	ScienceComplex	FF 2016-2018	Winter
798	399	2016-11-30	2016	31	0	0	0	35.1	NA	NA	NA	Annex	Ornilux 2016-2018	Winter
799	400	2016-12-01	2016	30	0	0	0	110.5	NA	NA	NA	ScienceComplex	FF 2016-2018	Winter
800	400	2016-12-01	2016	30	0	0	0	35.1	NA	NA	NA	Annex	Ornilux 2016-2018	Winter
801	401	2016-12-05	2016	28	0	0	0	110.5	NA	NA	NA	ScienceComplex	FF 2016-2018	Winter
802	401	2016-12-05	2016	28	0	0	0	35.1	NA	NA	NA	Annex	Ornilux 2016-2018	Winter
803	402	2016-12-06	2016	4	0	0	0	110.5	NA	NA	NA	ScienceComplex	FF 2016-2018	Winter
804	402	2016-12-06	2016	4	0	0	0	35.1	NA	NA	NA	Annex	Ornilux 2016-2018	Winter
805	403	2016-12-07	2016	28	0	0	0	110.5	NA	NA	NA	ScienceComplex	FF 2016-2018	Winter
806	403	2016-12-07	2016	28	0	0	0	35.1	NA	NA	NA	Annex	Ornilux 2016-2018	Winter
807	404	2016-12-08	2016	30	0	0	0	110.5	NA	NA	NA	ScienceComplex	FF 2016-2018	Winter
808	404	2016-12-08	2016	30	0	0	0	35.1	NA	NA	NA	Annex	Ornilux 2016-2018	Winter
809	405	2016-12-12	2016	28	0	0	0	110.5	NA	NA	NA	ScienceComplex	FF 2016-2018	Winter
810	405	2016-12-12	2016	28	0	0	0	35.1	NA	NA	NA	Annex	Ornilux 2016-2018	Winter
811	406	2016-12-14	2016	31	0	0	0	110.5	NA	NA	NA	ScienceComplex	FF 2016-2018	Winter
812	406	2016-12-14	2016	31	0	0	0	35.1	NA	NA	NA	Annex	Ornilux 2016-2018	Winter
813	407	2016-12-15	2016	4	0	0	0	110.5	NA	NA	NA	ScienceComplex	FF 2016-2018	Winter
814	407	2016-12-15	2016	4	0	0	0	35.1	NA	NA	NA	Annex	Ornilux 2016-2018	Winter
815	408	2016-12-19	2016	28	0	0	0	110.5	NA	NA	NA	ScienceComplex	FF 2016-2018	Winter
816	408	2016-12-19	2016	28	0	0	0	35.1	NA	NA	NA	Annex	Ornilux 2016-2018	Winter
817	409	2016-12-20	2016	4	0	0	0	110.5	NA	NA	NA	ScienceComplex	FF 2016-2018	Winter
818	409	2016-12-20	2016	4	0	0	0	35.1	NA	NA	NA	Annex	Ornilux 2016-2018	Winter
819	410	2016-12-21	2016	30	0	0	0	110.5	NA	NA	NA	ScienceComplex	FF 2016-2018	Winter
820	410	2016-12-21	2016	30	0	0	0	35.1	NA	NA	NA	Annex	Ornilux 2016-2018	Winter
821	411	2016-12-22	2016	30	0	0	0	110.5	NA	NA	NA	ScienceComplex	FF 2016-2018	Winter
822	411	2016-12-22	2016	30	0	0	0	35.1	NA	NA	NA	Annex	Ornilux 2016-2018	Winter
823	412	2017-01-03	2017	4	0	0	0	110.5	NA	NA	NA	ScienceComplex	FF 2016-2018	Winter
824	412	2017-01-03	2017	4	0	0	0	35.1	NA	NA	NA	Annex	Ornilux 2016-2018	Winter
825	413	2017-01-04	2017	31	0	0	0	110.5	NA	NA	NA	ScienceComplex	FF 2016-2018	Winter
826	413	2017-01-04	2017	31	0	0	0	35.1	NA	NA	NA	Annex	Ornilux 2016-2018	Winter
827	414	2017-01-05	2017	30	0	0	0	110.5	NA	NA	NA	ScienceComplex	FF 2016-2018	Winter
828	414	2017-01-05	2017	30	0	0	0	35.1	NA	NA	NA	Annex	Ornilux 2016-2018	Winter
829	415	2017-01-06	2017	28	0	0	0	110.5	NA	NA	NA	ScienceComplex	FF 2016-2018	Winter
830	415	2017-01-06	2017	28	0	0	0	35.1	NA	NA	NA	Annex	Ornilux 2016-2018	Winter
831	416	2017-01-09	2017	28	0	0	0	110.5	NA	NA	NA	ScienceComplex	FF 2016-2018	Winter
832	416	2017-01-09	2017	28	0	0	0	35.1	NA	NA	NA	Annex	Ornilux 2016-2018	Winter
833	417	2017-01-10	2017	4	0	0	0	110.5	NA	NA	NA	ScienceComplex	FF 2016-2018	Winter
834	417	2017-01-10	2017	4	0	0	0	35.1	NA	NA	NA	Annex	Ornilux 2016-2018	Winter
835	418	2017-01-11	2017	31	0	0	0	110.5	NA	NA	NA	ScienceComplex	FF 2016-2018	Winter
836	418	2017-01-11	2017	31	0	0	0	35.1	NA	NA	NA	Annex	Ornilux 2016-2018	Winter
837	419	2017-01-12	2017	30	0	0	0	110.5	NA	NA	NA	ScienceComplex	FF 2016-2018	Winter
838	419	2017-01-12	2017	30	0	0	0	35.1	NA	NA	NA	Annex	Ornilux 2016-2018	Winter
839	420	2017-01-17	2017	4	0	0	0	110.5	NA	NA	NA	ScienceComplex	FF 2016-2018	Winter
840	420	2017-01-17	2017	4	0	0	0	35.1	NA	NA	NA	Annex	Ornilux 2016-2018	Winter
841	421	2017-01-18	2017	31	0	0	0	110.5	NA	NA	NA	ScienceComplex	FF 2016-2018	Winter
842	421	2017-01-18	2017	31	0	0	0	35.1	NA	NA	NA	Annex	Ornilux 2016-2018	Winter
843	422	2017-01-19	2017	30	0	0	0	110.5	NA	NA	NA	ScienceComplex	FF 2016-2018	Winter
844	422	2017-01-19	2017	30	0	0	0	35.1	NA	NA	NA	Annex	Ornilux 2016-2018	Winter
845	423	2017-01-23	2017	33	0	0	0	110.5	NA	NA	NA	ScienceComplex	FF 2016-2018	Winter
846	423	2017-01-23	2017	33	0	0	0	35.1	NA	NA	NA	Annex	Ornilux 2016-2018	Winter
847	424	2017-01-24	2017	31	0	0	0	110.5	NA	NA	NA	ScienceComplex	FF 2016-2018	Winter
848	424	2017-01-24	2017	31	0	0	0	35.1	NA	NA	NA	Annex	Ornilux 2016-2018	Winter
849	425	2017-01-25	2017	31	0	0	0	110.5	NA	NA	NA	ScienceComplex	FF 2016-2018	Winter
850	425	2017-01-25	2017	31	0	0	0	35.1	NA	NA	NA	Annex	Ornilux 2016-2018	Winter
851	426	2017-01-26	2017	34	0	0	0	110.5	NA	NA	NA	ScienceComplex	FF 2016-2018	Winter
852	426	2017-01-26	2017	34	0	0	0	35.1	NA	NA	NA	Annex	Ornilux 2016-2018	Winter
853	427	2017-01-27	2017	3	0	0	0	110.5	NA	NA	NA	ScienceComplex	FF 2016-2018	Winter
854	427	2017-01-27	2017	3	0	0	0	35.1	NA	NA	NA	Annex	Ornilux 2016-2018	Winter
855	428	2017-01-30	2017	33	0	0	0	110.5	NA	NA	NA	ScienceComplex	FF 2016-2018	Winter
856	428	2017-01-30	2017	33	0	0	0	35.1	NA	NA	NA	Annex	Ornilux 2016-2018	Winter
857	429	2017-01-31	2017	4	0	0	0	110.5	NA	NA	NA	ScienceComplex	FF 2016-2018	Winter
858	429	2017-01-31	2017	4	0	0	0	35.1	NA	NA	NA	Annex	Ornilux 2016-2018	Winter
859	430	2017-02-02	2017	30	0	0	0	110.5	NA	NA	NA	ScienceComplex	FF 2016-2018	Winter
860	430	2017-02-02	2017	30	0	0	0	35.1	NA	NA	NA	Annex	Ornilux 2016-2018	Winter
861	431	2017-02-03	2017	3	0	0	0	110.5	NA	NA	NA	ScienceComplex	FF 2016-2018	Winter
862	431	2017-02-03	2017	3	0	0	0	35.1	NA	NA	NA	Annex	Ornilux 2016-2018	Winter
863	432	2017-02-06	2017	28	0	0	0	110.5	NA	NA	NA	ScienceComplex	FF 2016-2018	Winter
864	432	2017-02-06	2017	28	0	0	0	35.1	NA	NA	NA	Annex	Ornilux 2016-2018	Winter
865	433	2017-02-07	2017	4	0	0	0	110.5	NA	NA	NA	ScienceComplex	FF 2016-2018	Winter
866	433	2017-02-07	2017	4	0	0	0	35.1	NA	NA	NA	Annex	Ornilux 2016-2018	Winter
867	434	2017-02-08	2017	10	1	0	1	110.5	UNID	UK	b1.7	ScienceComplex	FF 2016-2018	Winter
868	434	2017-02-08	2017	10	0	0	0	35.1	NA	NA	NA	Annex	Ornilux 2016-2018	Winter
869	435	2017-02-09	2017	30	0	0	0	110.5	NA	NA	NA	ScienceComplex	FF 2016-2018	Winter
870	435	2017-02-09	2017	30	0	0	0	35.1	NA	NA	NA	Annex	Ornilux 2016-2018	Winter
871	436	2017-02-10	2017	3	0	0	0	110.5	NA	NA	NA	ScienceComplex	FF 2016-2018	Winter
872	436	2017-02-10	2017	3	0	0	0	35.1	NA	NA	NA	Annex	Ornilux 2016-2018	Winter
873	437	2017-02-14	2017	35	0	0	0	110.5	NA	NA	NA	ScienceComplex	FF 2016-2018	Winter
874	437	2017-02-14	2017	35	0	0	0	35.1	NA	NA	NA	Annex	Ornilux 2016-2018	Winter
875	438	2017-02-15	2017	31	0	0	0	110.5	NA	NA	NA	ScienceComplex	FF 2016-2018	Winter
876	438	2017-02-15	2017	31	0	0	0	35.1	NA	NA	NA	Annex	Ornilux 2016-2018	Winter
877	439	2017-02-16	2017	4	0	0	0	110.5	NA	NA	NA	ScienceComplex	FF 2016-2018	Winter
878	439	2017-02-16	2017	4	0	0	0	35.1	NA	NA	NA	Annex	Ornilux 2016-2018	Winter
879	440	2017-02-17	2017	3	0	0	0	110.5	NA	NA	NA	ScienceComplex	FF 2016-2018	Winter
880	440	2017-02-17	2017	3	0	0	0	35.1	NA	NA	NA	Annex	Ornilux 2016-2018	Winter
881	441	2017-02-20	2017	35	0	0	0	110.5	NA	NA	NA	ScienceComplex	FF 2016-2018	Winter
882	441	2017-02-20	2017	35	0	0	0	35.1	NA	NA	NA	Annex	Ornilux 2016-2018	Winter
883	442	2017-02-21	2017	35	0	0	0	110.5	NA	NA	NA	ScienceComplex	FF 2016-2018	Winter
884	442	2017-02-21	2017	35	0	0	0	35.1	NA	NA	NA	Annex	Ornilux 2016-2018	Winter
885	443	2017-02-22	2017	31	0	0	0	110.5	NA	NA	NA	ScienceComplex	FF 2016-2018	Winter
886	443	2017-02-22	2017	31	0	0	0	35.1	NA	NA	NA	Annex	Ornilux 2016-2018	Winter
887	444	2017-02-23	2017	15	0	0	0	110.5	NA	NA	NA	ScienceComplex	FF 2016-2018	Winter
888	444	2017-02-23	2017	15	0	0	0	35.1	NA	NA	NA	Annex	Ornilux 2016-2018	Winter
889	445	2017-02-24	2017	3	0	0	0	110.5	NA	NA	NA	ScienceComplex	FF 2016-2018	Winter
890	445	2017-02-24	2017	3	0	0	0	35.1	NA	NA	NA	Annex	Ornilux 2016-2018	Winter
891	446	2017-02-27	2017	28	0	0	0	110.5	NA	NA	NA	ScienceComplex	FF 2016-2018	Winter
892	446	2017-02-27	2017	28	0	0	0	35.1	NA	NA	NA	Annex	Ornilux 2016-2018	Winter
893	447	2017-02-28	2017	34	0	0	0	110.5	NA	NA	NA	ScienceComplex	FF 2016-2018	Winter
894	447	2017-02-28	2017	34	0	0	0	35.1	NA	NA	NA	Annex	Ornilux 2016-2018	Winter
895	448	2017-03-02	2017	35	0	0	0	110.5	NA	NA	NA	ScienceComplex	FF 2016-2018	Spring
896	448	2017-03-02	2017	35	0	0	0	35.1	NA	NA	NA	Annex	Ornilux 2016-2018	Spring
897	449	2017-03-03	2017	28	0	0	0	110.5	NA	NA	NA	ScienceComplex	FF 2016-2018	Spring
898	449	2017-03-03	2017	28	0	0	0	35.1	NA	NA	NA	Annex	Ornilux 2016-2018	Spring
899	450	2017-03-06	2017	28	0	0	0	110.5	NA	NA	NA	ScienceComplex	FF 2016-2018	Spring
900	450	2017-03-06	2017	28	0	0	0	35.1	NA	NA	NA	Annex	Ornilux 2016-2018	Spring
901	451	2017-03-08	2017	31	0	0	0	110.5	NA	NA	NA	ScienceComplex	FF 2016-2018	Spring
902	451	2017-03-08	2017	31	0	0	0	35.1	NA	NA	NA	Annex	Ornilux 2016-2018	Spring
903	452	2017-03-09	2017	28	0	0	0	110.5	NA	NA	NA	ScienceComplex	FF 2016-2018	Spring
904	452	2017-03-09	2017	28	0	0	0	35.1	NA	NA	NA	Annex	Ornilux 2016-2018	Spring
905	453	2017-03-10	2017	28	0	0	0	110.5	NA	NA	NA	ScienceComplex	FF 2016-2018	Spring
906	453	2017-03-10	2017	28	0	0	0	35.1	NA	NA	NA	Annex	Ornilux 2016-2018	Spring
907	454	2017-03-13	2017	10	0	0	0	110.5	NA	NA	NA	ScienceComplex	FF 2016-2018	Spring
908	454	2017-03-13	2017	10	0	0	0	35.1	NA	NA	NA	Annex	Ornilux 2016-2018	Spring
909	455	2017-03-14	2017	31	0	0	0	110.5	NA	NA	NA	ScienceComplex	FF 2016-2018	Spring
910	455	2017-03-14	2017	31	0	0	0	35.1	NA	NA	NA	Annex	Ornilux 2016-2018	Spring
911	456	2017-03-15	2017	31	0	0	0	110.5	NA	NA	NA	ScienceComplex	FF 2016-2018	Spring
912	456	2017-03-15	2017	31	0	0	0	35.1	NA	NA	NA	Annex	Ornilux 2016-2018	Spring
913	457	2017-03-16	2017	28	0	0	0	110.5	NA	NA	NA	ScienceComplex	FF 2016-2018	Spring
914	457	2017-03-16	2017	28	0	0	0	35.1	NA	NA	NA	Annex	Ornilux 2016-2018	Spring
915	458	2017-03-17	2017	3	0	0	0	110.5	NA	NA	NA	ScienceComplex	FF 2016-2018	Spring
916	458	2017-03-17	2017	3	0	0	0	35.1	NA	NA	NA	Annex	Ornilux 2016-2018	Spring
917	459	2017-03-20	2017	35	0	0	0	110.5	NA	NA	NA	ScienceComplex	FF 2016-2018	Spring
918	459	2017-03-20	2017	35	0	0	0	35.1	NA	NA	NA	Annex	Ornilux 2016-2018	Spring
919	460	2017-03-21	2017	35	0	0	0	110.5	NA	NA	NA	ScienceComplex	FF 2016-2018	Spring
920	460	2017-03-21	2017	35	0	0	0	35.1	NA	NA	NA	Annex	Ornilux 2016-2018	Spring
921	461	2017-03-22	2017	35	0	0	0	110.5	NA	NA	NA	ScienceComplex	FF 2016-2018	Spring
922	461	2017-03-22	2017	35	0	0	0	35.1	NA	NA	NA	Annex	Ornilux 2016-2018	Spring
923	462	2017-03-28	2017	4	0	0	0	110.5	NA	NA	NA	ScienceComplex	FF 2016-2018	Spring
924	462	2017-03-28	2017	4	0	0	0	35.1	NA	NA	NA	Annex	Ornilux 2016-2018	Spring
925	463	2017-03-30	2017	4	0	0	0	110.5	NA	NA	NA	ScienceComplex	FF 2016-2018	Spring
926	463	2017-03-30	2017	4	0	0	0	35.1	NA	NA	NA	Annex	Ornilux 2016-2018	Spring
927	464	2017-04-04	2017	4	0	0	0	110.5	NA	NA	NA	ScienceComplex	FF 2016-2018	Spring
928	464	2017-04-04	2017	4	0	0	0	35.1	NA	NA	NA	Annex	Ornilux 2016-2018	Spring
929	465	2017-04-06	2017	4	0	0	0	110.5	NA	NA	NA	ScienceComplex	FF 2016-2018	Spring
930	465	2017-04-06	2017	4	0	0	0	35.1	NA	NA	NA	Annex	Ornilux 2016-2018	Spring
931	466	2017-04-11	2017	28	0	0	0	110.5	NA	NA	NA	ScienceComplex	FF 2016-2018	Spring
932	466	2017-04-11	2017	28	0	0	0	35.1	NA	NA	NA	Annex	Ornilux 2016-2018	Spring
933	467	2017-04-13	2017	28	0	0	0	110.5	NA	NA	NA	ScienceComplex	FF 2016-2018	Spring
934	467	2017-04-13	2017	28	0	0	0	35.1	NA	NA	NA	Annex	Ornilux 2016-2018	Spring
935	468	2017-04-18	2017	4	0	0	0	110.5	NA	NA	NA	ScienceComplex	FF 2016-2018	Spring
936	468	2017-04-18	2017	4	0	0	0	35.1	NA	NA	NA	Annex	Ornilux 2016-2018	Spring
937	469	2017-04-20	2017	4	0	0	0	110.5	NA	NA	NA	ScienceComplex	FF 2016-2018	Spring
938	469	2017-04-20	2017	4	0	0	0	35.1	NA	NA	NA	Annex	Ornilux 2016-2018	Spring
939	470	2017-04-24	2017	4	0	0	0	110.5	NA	NA	NA	ScienceComplex	FF 2016-2018	Spring
940	470	2017-04-24	2017	4	0	0	0	35.1	NA	NA	NA	Annex	Ornilux 2016-2018	Spring
941	471	2017-04-25	2017	4	0	0	0	110.5	NA	NA	NA	ScienceComplex	FF 2016-2018	Spring
942	471	2017-04-25	2017	4	0	0	0	35.1	NA	NA	NA	Annex	Ornilux 2016-2018	Spring
943	472	2017-04-26	2017	3	0	0	0	110.5	NA	NA	NA	ScienceComplex	FF 2016-2018	Spring
944	472	2017-04-26	2017	3	0	0	0	35.1	NA	NA	NA	Annex	Ornilux 2016-2018	Spring
945	473	2017-04-27	2017	3	0	0	0	110.5	NA	NA	NA	ScienceComplex	FF 2016-2018	Spring
946	473	2017-04-27	2017	3	0	0	0	35.1	NA	NA	NA	Annex	Ornilux 2016-2018	Spring
947	474	2017-05-02	2017	4	0	0	0	110.5	NA	NA	NA	ScienceComplex	FF 2016-2018	Spring
948	474	2017-05-02	2017	4	0	0	0	35.1	NA	NA	NA	Annex	Ornilux 2016-2018	Spring
949	475	2017-05-03	2017	3	0	0	0	110.5	NA	NA	NA	ScienceComplex	FF 2016-2018	Spring
950	475	2017-05-03	2017	3	0	0	0	35.1	NA	NA	NA	Annex	Ornilux 2016-2018	Spring
951	476	2017-05-04	2017	18	0	0	0	110.5	NA	NA	NA	ScienceComplex	FF 2016-2018	Spring
952	476	2017-05-04	2017	18	0	0	0	35.1	NA	NA	NA	Annex	Ornilux 2016-2018	Spring
953	477	2017-05-05	2017	3	0	0	0	110.5	NA	NA	NA	ScienceComplex	FF 2016-2018	Spring
954	477	2017-05-05	2017	3	0	0	0	35.1	NA	NA	NA	Annex	Ornilux 2016-2018	Spring
955	478	2017-05-08	2017	4	0	0	0	110.5	NA	NA	NA	ScienceComplex	FF 2016-2018	Spring
956	478	2017-05-08	2017	4	0	0	0	35.1	NA	NA	NA	Annex	Ornilux 2016-2018	Spring
957	479	2017-05-09	2017	4	0	0	0	110.5	NA	NA	NA	ScienceComplex	FF 2016-2018	Spring
958	479	2017-05-09	2017	4	0	0	0	35.1	NA	NA	NA	Annex	Ornilux 2016-2018	Spring
959	480	2017-05-10	2017	3	0	0	0	110.5	NA	NA	NA	ScienceComplex	FF 2016-2018	Spring
960	480	2017-05-10	2017	3	0	0	0	35.1	NA	NA	NA	Annex	Ornilux 2016-2018	Spring
961	481	2017-05-11	2017	36	0	0	0	110.5	NA	NA	NA	ScienceComplex	FF 2016-2018	Spring
962	481	2017-05-11	2017	36	0	0	0	35.1	NA	NA	NA	Annex	Ornilux 2016-2018	Spring
963	482	2017-05-12	2017	3	0	0	0	110.5	NA	NA	NA	ScienceComplex	FF 2016-2018	Spring
964	482	2017-05-12	2017	3	0	0	0	35.1	NA	NA	NA	Annex	Ornilux 2016-2018	Spring
965	483	2017-05-17	2017	34	0	0	0	110.5	NA	NA	NA	ScienceComplex	FF 2016-2018	Spring
966	483	2017-05-17	2017	34	0	0	0	35.1	NA	NA	NA	Annex	Ornilux 2016-2018	Spring
967	484	2017-05-23	2017	4	0	0	0	110.5	NA	NA	NA	ScienceComplex	FF 2016-2018	Spring
968	484	2017-05-23	2017	4	0	0	0	35.1	NA	NA	NA	Annex	Ornilux 2016-2018	Spring
969	485	2017-05-24	2017	28	0	0	0	110.5	NA	NA	NA	ScienceComplex	FF 2016-2018	Spring
970	485	2017-05-24	2017	28	0	0	0	35.1	NA	NA	NA	Annex	Ornilux 2016-2018	Spring
971	486	2017-05-25	2017	4	0	0	0	110.5	NA	NA	NA	ScienceComplex	FF 2016-2018	Spring
972	486	2017-05-25	2017	4	0	0	0	35.1	NA	NA	NA	Annex	Ornilux 2016-2018	Spring
973	487	2017-05-30	2017	37	0	0	0	110.5	NA	NA	NA	ScienceComplex	FF 2016-2018	Spring
974	487	2017-05-30	2017	37	0	0	0	35.1	NA	NA	NA	Annex	Ornilux 2016-2018	Spring
975	488	2017-06-02	2017	2	0	0	0	110.5	NA	NA	NA	ScienceComplex	FF 2016-2018	Summer
976	488	2017-06-02	2017	2	0	0	0	35.1	NA	NA	NA	Annex	Ornilux 2016-2018	Summer
977	489	2017-06-05	2017	2	0	0	0	110.5	NA	NA	NA	ScienceComplex	FF 2016-2018	Summer
978	489	2017-06-05	2017	2	0	0	0	35.1	NA	NA	NA	Annex	Ornilux 2016-2018	Summer
979	490	2017-06-07	2017	33	0	0	0	110.5	NA	NA	NA	ScienceComplex	FF 2016-2018	Summer
980	490	2017-06-07	2017	33	0	0	0	35.1	NA	NA	NA	Annex	Ornilux 2016-2018	Summer
981	491	2017-06-09	2017	2	0	0	0	110.5	NA	NA	NA	ScienceComplex	FF 2016-2018	Summer
982	491	2017-06-09	2017	2	0	0	0	35.1	NA	NA	NA	Annex	Ornilux 2016-2018	Summer
983	492	2017-06-12	2017	2	0	0	0	110.5	NA	NA	NA	ScienceComplex	FF 2016-2018	Summer
984	492	2017-06-12	2017	2	0	0	0	35.1	NA	NA	NA	Annex	Ornilux 2016-2018	Summer
985	493	2017-06-13	2017	2	0	0	0	110.5	NA	NA	NA	ScienceComplex	FF 2016-2018	Summer
986	493	2017-06-13	2017	2	0	0	0	35.1	NA	NA	NA	Annex	Ornilux 2016-2018	Summer
987	494	2017-06-14	2017	2	0	0	0	110.5	NA	NA	NA	ScienceComplex	FF 2016-2018	Summer
988	494	2017-06-14	2017	2	0	0	0	35.1	NA	NA	NA	Annex	Ornilux 2016-2018	Summer
989	495	2017-06-15	2017	2	0	0	0	110.5	NA	NA	NA	ScienceComplex	FF 2016-2018	Summer
990	495	2017-06-15	2017	2	1	0	1	35.1	UNID	UK	b2.2	Annex	Ornilux 2016-2018	Summer
991	496	2017-06-16	2017	2	0	0	0	110.5	NA	NA	NA	ScienceComplex	FF 2016-2018	Summer
992	496	2017-06-16	2017	2	0	0	0	35.1	NA	NA	NA	Annex	Ornilux 2016-2018	Summer
993	497	2017-06-19	2017	2	0	0	0	110.5	NA	NA	NA	ScienceComplex	FF 2016-2018	Summer
994	497	2017-06-19	2017	2	0	0	0	35.1	NA	NA	NA	Annex	Ornilux 2016-2018	Summer
995	498	2017-06-20	2017	2	0	0	0	110.5	NA	NA	NA	ScienceComplex	FF 2016-2018	Summer
996	498	2017-06-20	2017	2	0	0	0	35.1	NA	NA	NA	Annex	Ornilux 2016-2018	Summer
997	499	2017-06-21	2017	2	0	0	0	110.5	NA	NA	NA	ScienceComplex	FF 2016-2018	Summer
998	499	2017-06-21	2017	2	0	0	0	35.1	NA	NA	NA	Annex	Ornilux 2016-2018	Summer
999	500	2017-06-22	2017	2	0	0	0	110.5	NA	NA	NA	ScienceComplex	FF 2016-2018	Summer
1000	500	2017-06-22	2017	2	0	0	0	35.1	NA	NA	NA	Annex	Ornilux 2016-2018	Summer
1001	501	2017-06-23	2017	2	0	0	0	110.5	NA	NA	NA	ScienceComplex	FF 2016-2018	Summer
1002	501	2017-06-23	2017	2	0	0	0	35.1	NA	NA	NA	Annex	Ornilux 2016-2018	Summer
1003	502	2017-06-26	2017	2	0	0	0	110.5	NA	NA	NA	ScienceComplex	FF 2016-2018	Summer
1004	502	2017-06-26	2017	2	0	0	0	35.1	NA	NA	NA	Annex	Ornilux 2016-2018	Summer
1005	503	2017-06-27	2017	2	0	0	0	110.5	NA	NA	NA	ScienceComplex	FF 2016-2018	Summer
1006	503	2017-06-27	2017	2	0	0	0	35.1	NA	NA	NA	Annex	Ornilux 2016-2018	Summer
1007	504	2017-06-28	2017	2	0	0	0	110.5	NA	NA	NA	ScienceComplex	FF 2016-2018	Summer
1008	504	2017-06-28	2017	2	0	0	0	35.1	NA	NA	NA	Annex	Ornilux 2016-2018	Summer
1009	505	2017-06-29	2017	2	0	0	0	110.5	NA	NA	NA	ScienceComplex	FF 2016-2018	Summer
1010	505	2017-06-29	2017	2	0	0	0	35.1	NA	NA	NA	Annex	Ornilux 2016-2018	Summer
1011	506	2017-06-30	2017	2	0	0	0	110.5	NA	NA	NA	ScienceComplex	FF 2016-2018	Summer
1012	506	2017-06-30	2017	2	0	0	0	35.1	NA	NA	NA	Annex	Ornilux 2016-2018	Summer
1013	507	2017-07-04	2017	2	0	0	0	110.5	NA	NA	NA	ScienceComplex	FF 2016-2018	Summer
1014	507	2017-07-04	2017	2	0	0	0	35.1	NA	NA	NA	Annex	Ornilux 2016-2018	Summer
1015	508	2017-07-05	2017	3	0	0	0	110.5	NA	NA	NA	ScienceComplex	FF 2016-2018	Summer
1016	508	2017-07-05	2017	3	0	0	0	35.1	NA	NA	NA	Annex	Ornilux 2016-2018	Summer
1017	509	2017-07-06	2017	4	0	0	0	110.5	NA	NA	NA	ScienceComplex	FF 2016-2018	Summer
1018	509	2017-07-06	2017	4	0	0	0	35.1	NA	NA	NA	Annex	Ornilux 2016-2018	Summer
1019	510	2017-07-07	2017	3	0	0	0	110.5	NA	NA	NA	ScienceComplex	FF 2016-2018	Summer
1020	510	2017-07-07	2017	3	0	0	0	35.1	NA	NA	NA	Annex	Ornilux 2016-2018	Summer
1021	511	2017-07-10	2017	2	0	0	0	110.5	NA	NA	NA	ScienceComplex	FF 2016-2018	Summer
1022	511	2017-07-10	2017	2	0	0	0	35.1	NA	NA	NA	Annex	Ornilux 2016-2018	Summer
1023	512	2017-07-11	2017	2	0	0	0	110.5	NA	NA	NA	ScienceComplex	FF 2016-2018	Summer
1024	512	2017-07-11	2017	2	0	0	0	35.1	NA	NA	NA	Annex	Ornilux 2016-2018	Summer
1025	513	2017-07-12	2017	2	0	0	0	110.5	NA	NA	NA	ScienceComplex	FF 2016-2018	Summer
1026	513	2017-07-12	2017	2	0	0	0	35.1	NA	NA	NA	Annex	Ornilux 2016-2018	Summer
1027	514	2017-07-13	2017	2	0	0	0	110.5	NA	NA	NA	ScienceComplex	FF 2016-2018	Summer
1028	514	2017-07-13	2017	2	0	0	0	35.1	NA	NA	NA	Annex	Ornilux 2016-2018	Summer
1029	515	2017-07-14	2017	2	0	0	0	110.5	NA	NA	NA	ScienceComplex	FF 2016-2018	Summer
1030	515	2017-07-14	2017	2	0	0	0	35.1	NA	NA	NA	Annex	Ornilux 2016-2018	Summer
1031	516	2017-07-17	2017	2	0	0	0	110.5	NA	NA	NA	ScienceComplex	FF 2016-2018	Summer
1032	516	2017-07-17	2017	2	0	0	0	35.1	NA	NA	NA	Annex	Ornilux 2016-2018	Summer
1033	517	2017-07-18	2017	2	0	0	0	110.5	NA	NA	NA	ScienceComplex	FF 2016-2018	Summer
1034	517	2017-07-18	2017	2	0	0	0	35.1	NA	NA	NA	Annex	Ornilux 2016-2018	Summer
1035	518	2017-07-19	2017	2	0	0	0	110.5	NA	NA	NA	ScienceComplex	FF 2016-2018	Summer
1036	518	2017-07-19	2017	2	0	0	0	35.1	NA	NA	NA	Annex	Ornilux 2016-2018	Summer
1037	519	2017-07-25	2017	2	0	0	0	110.5	NA	NA	NA	ScienceComplex	FF 2016-2018	Summer
1038	519	2017-07-25	2017	2	0	0	0	35.1	NA	NA	NA	Annex	Ornilux 2016-2018	Summer
1039	520	2017-07-28	2017	2	0	0	0	110.5	NA	NA	NA	ScienceComplex	FF 2016-2018	Summer
1040	520	2017-07-28	2017	2	0	0	0	35.1	NA	NA	NA	Annex	Ornilux 2016-2018	Summer
1041	521	2017-07-31	2017	2	0	0	0	110.5	NA	NA	NA	ScienceComplex	FF 2016-2018	Summer
1042	521	2017-07-31	2017	2	0	0	0	35.1	NA	NA	NA	Annex	Ornilux 2016-2018	Summer
1043	522	2017-08-01	2017	38	0	0	0	110.5	NA	NA	NA	ScienceComplex	FF 2016-2018	Summer
1044	522	2017-08-01	2017	38	0	0	0	35.1	NA	NA	NA	Annex	Ornilux 2016-2018	Summer
1045	523	2017-08-03	2017	2	0	0	0	110.5	NA	NA	NA	ScienceComplex	FF 2016-2018	Summer
1046	523	2017-08-03	2017	2	0	0	0	35.1	NA	NA	NA	Annex	Ornilux 2016-2018	Summer
1047	524	2017-08-04	2017	2	0	0	0	110.5	NA	NA	NA	ScienceComplex	FF 2016-2018	Summer
1048	524	2017-08-04	2017	2	0	0	0	35.1	NA	NA	NA	Annex	Ornilux 2016-2018	Summer
1049	525	2017-08-08	2017	2	0	0	0	110.5	NA	NA	NA	ScienceComplex	FF 2016-2018	Summer
1050	525	2017-08-08	2017	2	0	0	0	35.1	NA	NA	NA	Annex	Ornilux 2016-2018	Summer
1051	526	2017-08-09	2017	2	0	0	0	110.5	NA	NA	NA	ScienceComplex	FF 2016-2018	Summer
1052	526	2017-08-09	2017	2	0	0	0	35.1	NA	NA	NA	Annex	Ornilux 2016-2018	Summer
1053	527	2017-08-10	2017	4	0	0	0	110.5	NA	NA	NA	ScienceComplex	FF 2016-2018	Summer
1054	527	2017-08-10	2017	4	0	0	0	35.1	NA	NA	NA	Annex	Ornilux 2016-2018	Summer
1055	528	2017-08-14	2017	2	0	0	0	110.5	NA	NA	NA	ScienceComplex	FF 2016-2018	Summer
1056	528	2017-08-14	2017	2	0	0	0	35.1	NA	NA	NA	Annex	Ornilux 2016-2018	Summer
1057	529	2017-08-15	2017	2	0	0	0	110.5	NA	NA	NA	ScienceComplex	FF 2016-2018	Summer
1058	529	2017-08-15	2017	2	0	0	0	35.1	NA	NA	NA	Annex	Ornilux 2016-2018	Summer
1059	530	2017-08-16	2017	2	0	0	0	110.5	NA	NA	NA	ScienceComplex	FF 2016-2018	Summer
1060	530	2017-08-16	2017	2	0	0	0	35.1	NA	NA	NA	Annex	Ornilux 2016-2018	Summer
1061	531	2017-08-17	2017	2	0	0	0	110.5	NA	NA	NA	ScienceComplex	FF 2016-2018	Summer
1062	531	2017-08-17	2017	2	0	0	0	35.1	NA	NA	NA	Annex	Ornilux 2016-2018	Summer
1063	532	2017-08-18	2017	2	0	0	0	110.5	NA	NA	NA	ScienceComplex	FF 2016-2018	Summer
1064	532	2017-08-18	2017	2	0	0	0	35.1	NA	NA	NA	Annex	Ornilux 2016-2018	Summer
1065	533	2017-08-21	2017	2	0	0	0	110.5	NA	NA	NA	ScienceComplex	FF 2016-2018	Summer
1066	533	2017-08-21	2017	2	0	0	0	35.1	NA	NA	NA	Annex	Ornilux 2016-2018	Summer
1067	534	2017-08-22	2017	2	0	0	0	110.5	NA	NA	NA	ScienceComplex	FF 2016-2018	Summer
1068	534	2017-08-22	2017	2	0	0	0	35.1	NA	NA	NA	Annex	Ornilux 2016-2018	Summer
1069	535	2017-08-23	2017	2	0	0	0	110.5	NA	NA	NA	ScienceComplex	FF 2016-2018	Summer
1070	535	2017-08-23	2017	2	0	0	0	35.1	NA	NA	NA	Annex	Ornilux 2016-2018	Summer
1071	536	2017-08-24	2017	2	0	0	0	110.5	NA	NA	NA	ScienceComplex	FF 2016-2018	Summer
1072	536	2017-08-24	2017	2	0	0	0	35.1	NA	NA	NA	Annex	Ornilux 2016-2018	Summer
1073	537	2017-08-25	2017	2	0	0	0	110.5	NA	NA	NA	ScienceComplex	FF 2016-2018	Summer
1074	537	2017-08-25	2017	2	0	0	0	35.1	NA	NA	NA	Annex	Ornilux 2016-2018	Summer
1075	538	2017-09-07	2017	4	0	0	0	110.5	NA	NA	NA	ScienceComplex	FF 2016-2018	Fall
1076	538	2017-09-07	2017	4	0	0	0	35.1	NA	NA	NA	Annex	Ornilux 2016-2018	Fall
1077	539	2017-09-12	2017	4	0	0	0	110.5	NA	NA	NA	ScienceComplex	FF 2016-2018	Fall
1078	539	2017-09-12	2017	4	0	0	0	35.1	NA	NA	NA	Annex	Ornilux 2016-2018	Fall
1079	540	2017-09-19	2017	4	0	0	0	110.5	NA	NA	NA	ScienceComplex	FF 2016-2018	Fall
1080	540	2017-09-19	2017	4	0	0	0	35.1	NA	NA	NA	Annex	Ornilux 2016-2018	Fall
1081	541	2017-09-26	2017	4	0	0	0	110.5	NA	NA	NA	ScienceComplex	FF 2016-2018	Fall
1082	541	2017-09-26	2017	4	0	0	0	35.1	NA	NA	NA	Annex	Ornilux 2016-2018	Fall
1083	542	2017-10-05	2017	4	0	0	0	110.5	NA	NA	NA	ScienceComplex	FF 2016-2018	Fall
1084	542	2017-10-05	2017	4	0	0	0	35.1	NA	NA	NA	Annex	Ornilux 2016-2018	Fall
1085	543	2017-10-10	2017	4	0	0	0	110.5	NA	NA	NA	ScienceComplex	FF 2016-2018	Fall
1086	543	2017-10-10	2017	4	0	0	0	35.1	NA	NA	NA	Annex	Ornilux 2016-2018	Fall
1087	544	2017-10-11	2017	31	0	0	0	110.5	NA	NA	NA	ScienceComplex	FF 2016-2018	Fall
1088	544	2017-10-11	2017	31	0	0	0	35.1	NA	NA	NA	Annex	Ornilux 2016-2018	Fall
1089	545	2017-10-12	2017	39	0	0	0	110.5	NA	NA	NA	ScienceComplex	FF 2016-2018	Fall
1090	545	2017-10-12	2017	39	0	0	0	35.1	NA	NA	NA	Annex	Ornilux 2016-2018	Fall
1091	546	2017-10-13	2017	38	0	0	0	110.5	NA	NA	NA	ScienceComplex	FF 2016-2018	Fall
1092	546	2017-10-13	2017	38	0	0	0	35.1	NA	NA	NA	Annex	Ornilux 2016-2018	Fall
1093	547	2017-10-17	2017	4	0	0	0	110.5	NA	NA	NA	ScienceComplex	FF 2016-2018	Fall
1094	547	2017-10-17	2017	4	0	0	0	35.1	NA	NA	NA	Annex	Ornilux 2016-2018	Fall
1095	548	2017-10-18	2017	31	0	0	0	110.5	NA	NA	NA	ScienceComplex	FF 2016-2018	Fall
1096	548	2017-10-18	2017	31	0	0	0	35.1	NA	NA	NA	Annex	Ornilux 2016-2018	Fall
1097	549	2017-10-19	2017	4	0	0	0	110.5	NA	NA	NA	ScienceComplex	FF 2016-2018	Fall
1098	549	2017-10-19	2017	4	0	0	0	35.1	NA	NA	NA	Annex	Ornilux 2016-2018	Fall
1099	550	2017-10-24	2017	4	0	0	0	110.5	NA	NA	NA	ScienceComplex	FF 2016-2018	Fall
1100	550	2017-10-24	2017	4	0	0	0	35.1	NA	NA	NA	Annex	Ornilux 2016-2018	Fall
1101	551	2017-10-25	2017	31	0	0	0	110.5	NA	NA	NA	ScienceComplex	FF 2016-2018	Fall
1102	551	2017-10-25	2017	31	0	0	0	35.1	NA	NA	NA	Annex	Ornilux 2016-2018	Fall
1103	552	2017-10-26	2017	4	0	0	0	110.5	NA	NA	NA	ScienceComplex	FF 2016-2018	Fall
1104	552	2017-10-26	2017	4	0	0	0	35.1	NA	NA	NA	Annex	Ornilux 2016-2018	Fall
1105	553	2017-10-27	2017	38	0	0	0	110.5	NA	NA	NA	ScienceComplex	FF 2016-2018	Fall
1106	553	2017-10-27	2017	38	0	0	0	35.1	NA	NA	NA	Annex	Ornilux 2016-2018	Fall
1107	554	2017-10-31	2017	3	0	0	0	110.5	NA	NA	NA	ScienceComplex	FF 2016-2018	Fall
1108	554	2017-10-31	2017	3	0	0	0	35.1	NA	NA	NA	Annex	Ornilux 2016-2018	Fall
1109	555	2017-11-01	2017	31	0	0	0	110.5	NA	NA	NA	ScienceComplex	FF 2016-2018	Fall
1110	555	2017-11-01	2017	31	0	0	0	35.1	NA	NA	NA	Annex	Ornilux 2016-2018	Fall
1111	556	2017-11-02	2017	3	0	0	0	110.5	NA	NA	NA	ScienceComplex	FF 2016-2018	Fall
1112	556	2017-11-02	2017	3	0	0	0	35.1	NA	NA	NA	Annex	Ornilux 2016-2018	Fall
1113	557	2017-11-07	2017	3	0	0	0	110.5	NA	NA	NA	ScienceComplex	FF 2016-2018	Fall
1114	557	2017-11-07	2017	3	0	0	0	35.1	NA	NA	NA	Annex	Ornilux 2016-2018	Fall
1115	558	2017-11-08	2017	31	0	0	0	110.5	NA	NA	NA	ScienceComplex	FF 2016-2018	Fall
1116	558	2017-11-08	2017	31	0	0	0	35.1	NA	NA	NA	Annex	Ornilux 2016-2018	Fall
1117	559	2017-11-09	2017	3	0	0	0	110.5	NA	NA	NA	ScienceComplex	FF 2016-2018	Fall
1118	559	2017-11-09	2017	3	0	0	0	35.1	NA	NA	NA	Annex	Ornilux 2016-2018	Fall
1119	560	2017-11-14	2017	38	0	0	0	110.5	NA	NA	NA	ScienceComplex	FF 2016-2018	Fall
1120	560	2017-11-14	2017	38	0	0	0	35.1	NA	NA	NA	Annex	Ornilux 2016-2018	Fall
1121	561	2017-11-15	2017	31	0	0	0	110.5	NA	NA	NA	ScienceComplex	FF 2016-2018	Fall
1122	561	2017-11-15	2017	31	0	0	0	35.1	NA	NA	NA	Annex	Ornilux 2016-2018	Fall
1123	562	2017-11-16	2017	4	0	0	0	110.5	NA	NA	NA	ScienceComplex	FF 2016-2018	Fall
1124	562	2017-11-16	2017	4	0	0	0	35.1	NA	NA	NA	Annex	Ornilux 2016-2018	Fall
1125	563	2017-11-20	2017	30	0	0	0	110.5	NA	NA	NA	ScienceComplex	FF 2016-2018	Fall
1126	563	2017-11-20	2017	30	0	0	0	35.1	NA	NA	NA	Annex	Ornilux 2016-2018	Fall
1127	564	2017-11-21	2017	38	0	0	0	110.5	NA	NA	NA	ScienceComplex	FF 2016-2018	Fall
1128	564	2017-11-21	2017	38	0	0	0	35.1	NA	NA	NA	Annex	Ornilux 2016-2018	Fall
1129	565	2017-11-22	2017	30	0	0	0	110.5	NA	NA	NA	ScienceComplex	FF 2016-2018	Fall
1130	565	2017-11-22	2017	30	0	0	0	35.1	NA	NA	NA	Annex	Ornilux 2016-2018	Fall
1131	566	2017-11-28	2017	38	0	0	0	110.5	NA	NA	NA	ScienceComplex	FF 2016-2018	Fall
1132	566	2017-11-28	2017	38	0	0	0	35.1	NA	NA	NA	Annex	Ornilux 2016-2018	Fall
1133	567	2017-11-29	2017	28	0	0	0	110.5	NA	NA	NA	ScienceComplex	FF 2016-2018	Fall
1134	567	2017-11-29	2017	28	0	0	0	35.1	NA	NA	NA	Annex	Ornilux 2016-2018	Fall
1135	568	2017-11-30	2017	4	0	0	0	110.5	NA	NA	NA	ScienceComplex	FF 2016-2018	Fall
1136	568	2017-11-30	2017	4	0	0	0	35.1	NA	NA	NA	Annex	Ornilux 2016-2018	Fall
1137	569	2017-12-04	2017	30	0	0	0	110.5	NA	NA	NA	ScienceComplex	FF 2016-2018	Winter
1138	569	2017-12-04	2017	30	0	0	0	35.1	NA	NA	NA	Annex	Ornilux 2016-2018	Winter
1139	570	2017-12-05	2017	38	0	0	0	110.5	NA	NA	NA	ScienceComplex	FF 2016-2018	Winter
1140	570	2017-12-05	2017	38	0	0	0	35.1	NA	NA	NA	Annex	Ornilux 2016-2018	Winter
1141	571	2017-12-06	2017	30	0	0	0	110.5	NA	NA	NA	ScienceComplex	FF 2016-2018	Winter
1142	571	2017-12-06	2017	30	0	0	0	35.1	NA	NA	NA	Annex	Ornilux 2016-2018	Winter
1143	572	2017-12-07	2017	4	0	0	0	110.5	NA	NA	NA	ScienceComplex	FF 2016-2018	Winter
1144	572	2017-12-07	2017	4	0	0	0	35.1	NA	NA	NA	Annex	Ornilux 2016-2018	Winter
1145	573	2017-12-11	2017	30	0	0	0	110.5	NA	NA	NA	ScienceComplex	FF 2016-2018	Winter
1146	573	2017-12-11	2017	30	0	0	0	35.1	NA	NA	NA	Annex	Ornilux 2016-2018	Winter
1147	574	2017-12-12	2017	4	0	0	0	110.5	NA	NA	NA	ScienceComplex	FF 2016-2018	Winter
1148	574	2017-12-12	2017	4	0	0	0	35.1	NA	NA	NA	Annex	Ornilux 2016-2018	Winter
1149	575	2017-12-13	2017	31	0	0	0	110.5	NA	NA	NA	ScienceComplex	FF 2016-2018	Winter
1150	575	2017-12-13	2017	31	0	0	0	35.1	NA	NA	NA	Annex	Ornilux 2016-2018	Winter
1151	576	2017-12-14	2017	38	0	0	0	110.5	NA	NA	NA	ScienceComplex	FF 2016-2018	Winter
1152	576	2017-12-14	2017	38	0	0	0	35.1	NA	NA	NA	Annex	Ornilux 2016-2018	Winter
1153	577	2017-12-18	2017	30	0	0	0	110.5	NA	NA	NA	ScienceComplex	FF 2016-2018	Winter
1154	577	2017-12-18	2017	30	0	0	0	35.1	NA	NA	NA	Annex	Ornilux 2016-2018	Winter
1155	578	2017-12-19	2017	38	0	0	0	110.5	NA	NA	NA	ScienceComplex	FF 2016-2018	Winter
1156	578	2017-12-19	2017	38	0	0	0	35.1	NA	NA	NA	Annex	Ornilux 2016-2018	Winter
1157	579	2017-12-20	2017	38	0	0	0	110.5	NA	NA	NA	ScienceComplex	FF 2016-2018	Winter
1158	579	2017-12-20	2017	38	0	0	0	35.1	NA	NA	NA	Annex	Ornilux 2016-2018	Winter
1159	580	2017-12-21	2017	4	0	0	0	110.5	NA	NA	NA	ScienceComplex	FF 2016-2018	Winter
1160	580	2017-12-21	2017	4	0	0	0	35.1	NA	NA	NA	Annex	Ornilux 2016-2018	Winter
1161	581	2017-12-22	2017	3	0	0	0	110.5	NA	NA	NA	ScienceComplex	FF 2016-2018	Winter
1162	581	2017-12-22	2017	3	0	0	0	35.1	NA	NA	NA	Annex	Ornilux 2016-2018	Winter
1163	582	2018-01-02	2018	4	0	0	0	110.5	NA	NA	NA	ScienceComplex	FF 2016-2018	Winter
1164	582	2018-01-02	2018	4	0	0	0	35.1	NA	NA	NA	Annex	Ornilux 2016-2018	Winter
1165	583	2018-01-03	2018	28	0	0	0	110.5	NA	NA	NA	ScienceComplex	FF 2016-2018	Winter
1166	583	2018-01-03	2018	28	0	0	0	35.1	NA	NA	NA	Annex	Ornilux 2016-2018	Winter
1167	584	2018-01-04	2018	4	0	0	0	110.5	NA	NA	NA	ScienceComplex	FF 2016-2018	Winter
1168	584	2018-01-04	2018	4	0	1	1	35.1	UNID	UK	b2.2	Annex	Ornilux 2016-2018	Winter
1169	585	2018-01-05	2018	3	0	0	0	110.5	NA	NA	NA	ScienceComplex	FF 2016-2018	Winter
1170	585	2018-01-05	2018	3	0	0	0	35.1	NA	NA	NA	Annex	Ornilux 2016-2018	Winter
1171	586	2018-01-09	2018	4	0	0	0	110.5	NA	NA	NA	ScienceComplex	FF 2016-2018	Winter
1172	586	2018-01-09	2018	4	0	0	0	35.1	NA	NA	NA	Annex	Ornilux 2016-2018	Winter
1173	587	2018-01-10	2018	15	0	0	0	110.5	NA	NA	NA	ScienceComplex	FF 2016-2018	Winter
1174	587	2018-01-10	2018	15	0	0	0	35.1	NA	NA	NA	Annex	Ornilux 2016-2018	Winter
1175	588	2018-01-11	2018	15	0	0	0	110.5	NA	NA	NA	ScienceComplex	FF 2016-2018	Winter
1176	588	2018-01-11	2018	15	0	0	0	35.1	NA	NA	NA	Annex	Ornilux 2016-2018	Winter
1177	589	2018-01-15	2018	15	0	0	0	110.5	NA	NA	NA	ScienceComplex	FF 2016-2018	Winter
1178	589	2018-01-15	2018	15	0	0	0	35.1	NA	NA	NA	Annex	Ornilux 2016-2018	Winter
1179	590	2018-01-16	2018	38	0	0	0	110.5	NA	NA	NA	ScienceComplex	FF 2016-2018	Winter
1180	590	2018-01-16	2018	38	0	0	0	35.1	NA	NA	NA	Annex	Ornilux 2016-2018	Winter
1181	591	2018-01-17	2018	15	0	0	0	110.5	NA	NA	NA	ScienceComplex	FF 2016-2018	Winter
1182	591	2018-01-17	2018	15	0	0	0	35.1	NA	NA	NA	Annex	Ornilux 2016-2018	Winter
1183	592	2018-01-18	2018	4	0	0	0	110.5	NA	NA	NA	ScienceComplex	FF 2016-2018	Winter
1184	592	2018-01-18	2018	4	0	0	0	35.1	NA	NA	NA	Annex	Ornilux 2016-2018	Winter
1185	593	2018-01-19	2018	28	0	0	0	110.5	NA	NA	NA	ScienceComplex	FF 2016-2018	Winter
1186	593	2018-01-19	2018	28	0	0	0	35.1	NA	NA	NA	Annex	Ornilux 2016-2018	Winter
1187	594	2018-01-22	2018	15	0	0	0	110.5	NA	NA	NA	ScienceComplex	FF 2016-2018	Winter
1188	594	2018-01-22	2018	15	0	0	0	35.1	NA	NA	NA	Annex	Ornilux 2016-2018	Winter
1189	595	2018-01-24	2018	31	0	0	0	110.5	NA	NA	NA	ScienceComplex	FF 2016-2018	Winter
1190	595	2018-01-24	2018	31	0	0	0	35.1	NA	NA	NA	Annex	Ornilux 2016-2018	Winter
1191	596	2018-01-25	2018	28	0	0	0	110.5	NA	NA	NA	ScienceComplex	FF 2016-2018	Winter
1192	596	2018-01-25	2018	28	0	0	0	35.1	NA	NA	NA	Annex	Ornilux 2016-2018	Winter
1193	597	2018-01-26	2018	28	0	0	0	110.5	NA	NA	NA	ScienceComplex	FF 2016-2018	Winter
1194	597	2018-01-26	2018	28	0	0	0	35.1	NA	NA	NA	Annex	Ornilux 2016-2018	Winter
1195	598	2018-01-29	2018	28	0	1	1	110.5	UNID	UK	b1.2	ScienceComplex	FF 2016-2018	Winter
1196	598	2018-01-29	2018	28	0	0	0	35.1	NA	NA	NA	Annex	Ornilux 2016-2018	Winter
1197	599	2018-01-30	2018	4	0	0	0	110.5	NA	NA	NA	ScienceComplex	FF 2016-2018	Winter
1198	599	2018-01-30	2018	4	0	1	1	35.1	UNID	UK	b2.2	Annex	Ornilux 2016-2018	Winter
1199	600	2018-01-31	2018	31	0	0	0	110.5	NA	NA	NA	ScienceComplex	FF 2016-2018	Winter
1200	600	2018-01-31	2018	31	0	0	0	35.1	NA	NA	NA	Annex	Ornilux 2016-2018	Winter
1201	601	2018-02-01	2018	4	0	0	0	110.5	NA	NA	NA	ScienceComplex	FF 2016-2018	Winter
1202	601	2018-02-01	2018	4	0	0	0	35.1	NA	NA	NA	Annex	Ornilux 2016-2018	Winter
1203	602	2018-02-02	2018	28	0	0	0	110.5	NA	NA	NA	ScienceComplex	FF 2016-2018	Winter
1204	602	2018-02-02	2018	28	0	0	0	35.1	NA	NA	NA	Annex	Ornilux 2016-2018	Winter
1205	603	2018-02-07	2018	31	0	0	0	110.5	NA	NA	NA	ScienceComplex	FF 2016-2018	Winter
1206	603	2018-02-07	2018	31	0	0	0	35.1	NA	NA	NA	Annex	Ornilux 2016-2018	Winter
1207	604	2018-02-08	2018	4	0	0	0	110.5	NA	NA	NA	ScienceComplex	FF 2016-2018	Winter
1208	604	2018-02-08	2018	4	0	0	0	35.1	NA	NA	NA	Annex	Ornilux 2016-2018	Winter
1209	605	2018-02-12	2018	15	0	0	0	110.5	NA	NA	NA	ScienceComplex	FF 2016-2018	Winter
1210	605	2018-02-12	2018	15	0	0	0	35.1	NA	NA	NA	Annex	Ornilux 2016-2018	Winter
1211	606	2018-02-13	2018	15	0	0	0	110.5	NA	NA	NA	ScienceComplex	FF 2016-2018	Winter
1212	606	2018-02-13	2018	15	0	0	0	35.1	NA	NA	NA	Annex	Ornilux 2016-2018	Winter
1213	607	2018-02-19	2018	15	0	0	0	110.5	NA	NA	NA	ScienceComplex	FF 2016-2018	Winter
1214	607	2018-02-19	2018	15	0	0	0	35.1	NA	NA	NA	Annex	Ornilux 2016-2018	Winter
1215	608	2018-02-20	2018	4	0	0	0	110.5	NA	NA	NA	ScienceComplex	FF 2016-2018	Winter
1216	608	2018-02-20	2018	4	0	0	0	35.1	NA	NA	NA	Annex	Ornilux 2016-2018	Winter
1217	609	2018-02-22	2018	3	0	0	0	110.5	NA	NA	NA	ScienceComplex	FF 2016-2018	Winter
1218	609	2018-02-22	2018	3	0	0	0	35.1	NA	NA	NA	Annex	Ornilux 2016-2018	Winter
1219	610	2018-02-27	2018	4	0	0	0	110.5	NA	NA	NA	ScienceComplex	FF 2016-2018	Winter
1220	610	2018-02-27	2018	4	0	0	0	35.1	NA	NA	NA	Annex	Ornilux 2016-2018	Winter
1221	611	2018-02-28	2018	3	0	0	0	110.5	NA	NA	NA	ScienceComplex	FF 2016-2018	Winter
1222	611	2018-02-28	2018	3	0	0	0	35.1	NA	NA	NA	Annex	Ornilux 2016-2018	Winter
1223	612	2018-03-01	2018	3	0	0	0	110.5	NA	NA	NA	ScienceComplex	FF 2016-2018	Spring
1224	612	2018-03-01	2018	3	0	0	0	35.1	NA	NA	NA	Annex	Ornilux 2016-2018	Spring
1225	613	2018-03-02	2018	3	0	0	0	110.5	NA	NA	NA	ScienceComplex	FF 2016-2018	Spring
1226	613	2018-03-02	2018	3	0	0	0	35.1	NA	NA	NA	Annex	Ornilux 2016-2018	Spring
1227	614	2018-03-06	2018	31	0	0	0	110.5	NA	NA	NA	ScienceComplex	FF 2016-2018	Spring
1228	614	2018-03-06	2018	31	0	0	0	35.1	NA	NA	NA	Annex	Ornilux 2016-2018	Spring
1229	615	2018-03-07	2018	4	0	0	0	110.5	NA	NA	NA	ScienceComplex	FF 2016-2018	Spring
1230	615	2018-03-07	2018	4	0	0	0	35.1	NA	NA	NA	Annex	Ornilux 2016-2018	Spring
1231	616	2018-03-09	2018	4	0	0	0	110.5	NA	NA	NA	ScienceComplex	FF 2016-2018	Spring
1232	616	2018-03-09	2018	4	0	0	0	35.1	NA	NA	NA	Annex	Ornilux 2016-2018	Spring
1233	617	2018-03-14	2018	31	0	0	0	110.5	NA	NA	NA	ScienceComplex	FF 2016-2018	Spring
1234	617	2018-03-14	2018	31	0	0	0	35.1	NA	NA	NA	Annex	Ornilux 2016-2018	Spring
1235	618	2018-03-15	2018	4	0	0	0	110.5	NA	NA	NA	ScienceComplex	FF 2016-2018	Spring
1236	618	2018-03-15	2018	4	0	0	0	35.1	NA	NA	NA	Annex	Ornilux 2016-2018	Spring
1237	619	2018-03-16	2018	28	0	0	0	110.5	NA	NA	NA	ScienceComplex	FF 2016-2018	Spring
1238	619	2018-03-16	2018	28	0	0	0	35.1	NA	NA	NA	Annex	Ornilux 2016-2018	Spring
1239	620	2018-03-19	2018	15	0	0	0	110.5	NA	NA	NA	ScienceComplex	FF 2016-2018	Spring
1240	620	2018-03-19	2018	15	0	0	0	35.1	NA	NA	NA	Annex	Ornilux 2016-2018	Spring
1241	621	2018-03-20	2018	40	0	0	0	110.5	NA	NA	NA	ScienceComplex	FF 2016-2018	Spring
1242	621	2018-03-20	2018	40	0	0	0	35.1	NA	NA	NA	Annex	Ornilux 2016-2018	Spring
1243	622	2018-03-23	2018	3	0	0	0	110.5	NA	NA	NA	ScienceComplex	FF 2016-2018	Spring
1244	622	2018-03-23	2018	3	0	0	0	35.1	NA	NA	NA	Annex	Ornilux 2016-2018	Spring
1245	623	2018-03-26	2018	15	0	0	0	110.5	NA	NA	NA	ScienceComplex	FF 2016-2018	Spring
1246	623	2018-03-26	2018	15	0	0	0	35.1	NA	NA	NA	Annex	Ornilux 2016-2018	Spring
1247	624	2018-03-27	2018	3	0	0	0	110.5	NA	NA	NA	ScienceComplex	FF 2016-2018	Spring
1248	624	2018-03-27	2018	3	0	0	0	35.1	NA	NA	NA	Annex	Ornilux 2016-2018	Spring
1249	625	2018-03-28	2018	31	0	0	0	110.5	NA	NA	NA	ScienceComplex	FF 2016-2018	Spring
1250	625	2018-03-28	2018	31	0	0	0	35.1	NA	NA	NA	Annex	Ornilux 2016-2018	Spring
1251	626	2018-03-29	2018	41	0	0	0	110.5	NA	NA	NA	ScienceComplex	FF 2016-2018	Spring
1252	626	2018-03-29	2018	41	0	0	0	35.1	NA	NA	NA	Annex	Ornilux 2016-2018	Spring
1253	627	2018-04-03	2018	4	0	0	0	110.5	NA	NA	NA	ScienceComplex	FF 2016-2018	Spring
1254	627	2018-04-03	2018	4	0	0	0	35.1	NA	NA	NA	Annex	Ornilux 2016-2018	Spring
1255	628	2018-04-04	2018	31	0	0	0	110.5	NA	NA	NA	ScienceComplex	FF 2016-2018	Spring
1256	628	2018-04-04	2018	31	0	0	0	35.1	NA	NA	NA	Annex	Ornilux 2016-2018	Spring
1257	629	2018-04-05	2018	40	0	0	0	110.5	NA	NA	NA	ScienceComplex	FF 2016-2018	Spring
1258	629	2018-04-05	2018	40	0	0	0	35.1	NA	NA	NA	Annex	Ornilux 2016-2018	Spring
1259	630	2018-04-09	2018	41	0	0	0	110.5	NA	NA	NA	ScienceComplex	FF 2016-2018	Spring
1260	630	2018-04-09	2018	41	0	0	0	35.1	NA	NA	NA	Annex	Ornilux 2016-2018	Spring
1261	631	2018-04-12	2018	4	0	0	0	110.5	NA	NA	NA	ScienceComplex	FF 2016-2018	Spring
1262	631	2018-04-12	2018	4	0	0	0	35.1	NA	NA	NA	Annex	Ornilux 2016-2018	Spring
1263	632	2018-04-16	2018	15	0	0	0	110.5	NA	NA	NA	ScienceComplex	FF 2016-2018	Spring
1264	632	2018-04-16	2018	15	0	0	0	35.1	NA	NA	NA	Annex	Ornilux 2016-2018	Spring
1265	633	2018-04-17	2018	42	0	0	0	110.5	NA	NA	NA	ScienceComplex	FF 2016-2018	Spring
1266	633	2018-04-17	2018	42	0	0	0	35.1	NA	NA	NA	Annex	Ornilux 2016-2018	Spring
1267	634	2018-04-18	2018	41	0	0	0	110.5	NA	NA	NA	ScienceComplex	FF 2016-2018	Spring
1268	634	2018-04-18	2018	41	0	0	0	35.1	NA	NA	NA	Annex	Ornilux 2016-2018	Spring
1269	635	2018-04-19	2018	4	0	0	0	110.5	NA	NA	NA	ScienceComplex	FF 2016-2018	Spring
1270	635	2018-04-19	2018	4	0	0	0	35.1	NA	NA	NA	Annex	Ornilux 2016-2018	Spring
1271	636	2018-04-20	2018	28	0	0	0	110.5	NA	NA	NA	ScienceComplex	FF 2016-2018	Spring
1272	636	2018-04-20	2018	28	0	0	0	35.1	NA	NA	NA	Annex	Ornilux 2016-2018	Spring
1273	637	2018-04-23	2018	15	0	0	0	110.5	NA	NA	NA	ScienceComplex	FF 2016-2018	Spring
1274	637	2018-04-23	2018	15	0	0	0	35.1	NA	NA	NA	Annex	Ornilux 2016-2018	Spring
1275	638	2018-04-24	2018	41	0	0	0	110.5	NA	NA	NA	ScienceComplex	FF 2016-2018	Spring
1276	638	2018-04-24	2018	41	0	0	0	35.1	NA	NA	NA	Annex	Ornilux 2016-2018	Spring
1277	639	2018-04-25	2018	40	0	0	0	110.5	NA	NA	NA	ScienceComplex	FF 2016-2018	Spring
1278	639	2018-04-25	2018	40	0	0	0	35.1	NA	NA	NA	Annex	Ornilux 2016-2018	Spring
1279	640	2018-04-26	2018	40	0	0	0	110.5	NA	NA	NA	ScienceComplex	FF 2016-2018	Spring
1280	640	2018-04-26	2018	40	0	0	0	35.1	NA	NA	NA	Annex	Ornilux 2016-2018	Spring
1281	641	2018-04-27	2018	28	0	0	0	110.5	NA	NA	NA	ScienceComplex	FF 2016-2018	Spring
1282	641	2018-04-27	2018	28	0	0	0	35.1	NA	NA	NA	Annex	Ornilux 2016-2018	Spring
1283	642	2018-04-30	2018	15	0	0	0	110.5	NA	NA	NA	ScienceComplex	FF 2016-2018	Spring
1284	642	2018-04-30	2018	15	0	0	0	35.1	NA	NA	NA	Annex	Ornilux 2016-2018	Spring
1285	643	2018-05-01	2018	41	0	0	0	110.5	NA	NA	NA	ScienceComplex	FF 2016-2018	Spring
1286	643	2018-05-01	2018	41	0	0	0	35.1	NA	NA	NA	Annex	Ornilux 2016-2018	Spring
1287	644	2018-05-03	2018	4	0	0	0	110.5	NA	NA	NA	ScienceComplex	FF 2016-2018	Spring
1288	644	2018-05-03	2018	4	0	0	0	35.1	NA	NA	NA	Annex	Ornilux 2016-2018	Spring
1289	645	2018-05-04	2018	28	0	0	0	110.5	NA	NA	NA	ScienceComplex	FF 2016-2018	Spring
1290	645	2018-05-04	2018	28	0	0	0	35.1	NA	NA	NA	Annex	Ornilux 2016-2018	Spring
1291	646	2018-05-07	2018	15	0	0	0	110.5	NA	NA	NA	ScienceComplex	FF 2016-2018	Spring
1292	646	2018-05-07	2018	15	0	0	0	35.1	NA	NA	NA	Annex	Ornilux 2016-2018	Spring
1293	647	2018-05-08	2018	3	0	0	0	110.5	NA	NA	NA	ScienceComplex	FF 2016-2018	Spring
1294	647	2018-05-08	2018	3	0	0	0	35.1	NA	NA	NA	Annex	Ornilux 2016-2018	Spring
1295	648	2018-05-10	2018	3	0	0	0	110.5	NA	NA	NA	ScienceComplex	FF 2016-2018	Spring
1296	648	2018-05-10	2018	3	0	0	0	35.1	NA	NA	NA	Annex	Ornilux 2016-2018	Spring
1297	649	2018-05-11	2018	3	0	0	0	110.5	NA	NA	NA	ScienceComplex	FF 2016-2018	Spring
1298	649	2018-05-11	2018	3	0	0	0	35.1	NA	NA	NA	Annex	Ornilux 2016-2018	Spring
1299	650	2018-05-14	2018	15	0	0	0	110.5	NA	NA	NA	ScienceComplex	FF 2016-2018	Spring
1300	650	2018-05-14	2018	15	0	0	0	35.1	NA	NA	NA	Annex	Ornilux 2016-2018	Spring
1301	651	2018-05-15	2018	4	0	0	0	110.5	NA	NA	NA	ScienceComplex	FF 2016-2018	Spring
1302	651	2018-05-15	2018	4	0	0	0	35.1	NA	NA	NA	Annex	Ornilux 2016-2018	Spring
1303	652	2018-05-16	2018	31	0	0	0	110.5	NA	NA	NA	ScienceComplex	FF 2016-2018	Spring
1304	652	2018-05-16	2018	31	0	0	0	35.1	NA	NA	NA	Annex	Ornilux 2016-2018	Spring
1305	653	2018-05-17	2018	3	0	0	0	110.5	NA	NA	NA	ScienceComplex	FF 2016-2018	Spring
1306	653	2018-05-17	2018	3	0	0	0	35.1	NA	NA	NA	Annex	Ornilux 2016-2018	Spring
1307	654	2018-05-22	2018	4	0	0	0	110.5	NA	NA	NA	ScienceComplex	FF 2016-2018	Spring
1308	654	2018-05-22	2018	4	0	0	0	35.1	NA	NA	NA	Annex	Ornilux 2016-2018	Spring
1309	655	2018-05-23	2018	15	0	0	0	110.5	NA	NA	NA	ScienceComplex	FF 2016-2018	Spring
1310	655	2018-05-23	2018	15	0	0	0	35.1	NA	NA	NA	Annex	Ornilux 2016-2018	Spring
1311	656	2018-05-24	2018	3	0	0	0	110.5	NA	NA	NA	ScienceComplex	FF 2016-2018	Spring
1312	656	2018-05-24	2018	3	0	0	0	35.1	NA	NA	NA	Annex	Ornilux 2016-2018	Spring
1313	657	2018-05-28	2018	4	0	0	0	110.5	NA	NA	NA	ScienceComplex	FF 2016-2018	Spring
1314	657	2018-05-28	2018	4	0	0	0	35.1	NA	NA	NA	Annex	Ornilux 2016-2018	Spring
1315	658	2018-05-29	2018	3	0	0	0	110.5	NA	NA	NA	ScienceComplex	FF 2016-2018	Spring
1316	658	2018-05-29	2018	3	0	0	0	35.1	NA	NA	NA	Annex	Ornilux 2016-2018	Spring
1317	659	2018-06-01	2018	3	0	0	0	110.5	NA	NA	NA	ScienceComplex	FF 2016-2018	Summer
1318	659	2018-06-01	2018	3	0	0	0	35.1	NA	NA	NA	Annex	Ornilux 2016-2018	Summer
1319	660	2018-06-04	2018	15	0	0	0	110.5	NA	NA	NA	ScienceComplex	FF 2016-2018	Summer
1320	660	2018-06-04	2018	15	0	0	0	35.1	NA	NA	NA	Annex	Ornilux 2016-2018	Summer
1321	661	2018-06-05	2018	43	0	0	0	110.5	NA	NA	NA	ScienceComplex	FF 2016-2018	Summer
1322	661	2018-06-05	2018	43	0	0	0	35.1	NA	NA	NA	Annex	Ornilux 2016-2018	Summer
1323	662	2018-06-06	2018	43	0	0	0	110.5	NA	NA	NA	ScienceComplex	FF 2016-2018	Summer
1324	662	2018-06-06	2018	43	0	0	0	35.1	NA	NA	NA	Annex	Ornilux 2016-2018	Summer
1325	663	2018-06-07	2018	43	0	0	0	110.5	NA	NA	NA	ScienceComplex	FF 2016-2018	Summer
1326	663	2018-06-07	2018	43	0	0	0	35.1	NA	NA	NA	Annex	Ornilux 2016-2018	Summer
1327	664	2018-06-08	2018	44	0	0	0	110.5	NA	NA	NA	ScienceComplex	FF 2016-2018	Summer
1328	664	2018-06-08	2018	44	0	0	0	35.1	NA	NA	NA	Annex	Ornilux 2016-2018	Summer
1329	665	2018-06-11	2018	15	0	0	0	110.5	NA	NA	NA	ScienceComplex	FF 2016-2018	Summer
1330	665	2018-06-11	2018	15	0	0	0	35.1	NA	NA	NA	Annex	Ornilux 2016-2018	Summer
1331	666	2018-06-12	2018	3	0	0	0	110.5	NA	NA	NA	ScienceComplex	FF 2016-2018	Summer
1332	666	2018-06-12	2018	3	0	0	0	35.1	NA	NA	NA	Annex	Ornilux 2016-2018	Summer
1333	667	2018-06-13	2018	3	0	0	0	110.5	NA	NA	NA	ScienceComplex	FF 2016-2018	Summer
1334	667	2018-06-13	2018	3	0	0	0	35.1	NA	NA	NA	Annex	Ornilux 2016-2018	Summer
1335	668	2018-06-14	2018	45	0	0	0	110.5	NA	NA	NA	ScienceComplex	FF 2016-2018	Summer
1336	668	2018-06-14	2018	45	0	0	0	35.1	NA	NA	NA	Annex	Ornilux 2016-2018	Summer
1337	669	2018-06-15	2018	46	0	0	0	110.5	NA	NA	NA	ScienceComplex	FF 2016-2018	Summer
1338	669	2018-06-15	2018	46	0	0	0	35.1	NA	NA	NA	Annex	Ornilux 2016-2018	Summer
1339	670	2018-06-18	2018	45	0	0	0	110.5	NA	NA	NA	ScienceComplex	FF 2016-2018	Summer
1340	670	2018-06-18	2018	45	0	0	0	35.1	NA	NA	NA	Annex	Ornilux 2016-2018	Summer
1341	671	2018-06-19	2018	45	0	0	0	110.5	NA	NA	NA	ScienceComplex	FF 2016-2018	Summer
1342	671	2018-06-19	2018	45	0	0	0	35.1	NA	NA	NA	Annex	Ornilux 2016-2018	Summer
1343	672	2018-06-21	2018	4	0	0	0	110.5	NA	NA	NA	ScienceComplex	FF 2016-2018	Summer
1344	672	2018-06-21	2018	4	0	0	0	35.1	NA	NA	NA	Annex	Ornilux 2016-2018	Summer
1345	673	2018-06-22	2018	3	0	0	0	110.5	NA	NA	NA	ScienceComplex	FF 2016-2018	Summer
1346	673	2018-06-22	2018	3	0	0	0	35.1	NA	NA	NA	Annex	Ornilux 2016-2018	Summer
1347	674	2018-06-25	2018	47	0	0	0	110.5	NA	NA	NA	ScienceComplex	FF 2016-2018	Summer
1348	674	2018-06-25	2018	47	0	0	0	35.1	NA	NA	NA	Annex	Ornilux 2016-2018	Summer
1349	675	2018-06-26	2018	48	0	0	0	110.5	NA	NA	NA	ScienceComplex	FF 2016-2018	Summer
1350	675	2018-06-26	2018	48	0	0	0	35.1	NA	NA	NA	Annex	Ornilux 2016-2018	Summer
1351	676	2018-06-27	2018	40	0	0	0	110.5	NA	NA	NA	ScienceComplex	FF 2016-2018	Summer
1352	676	2018-06-27	2018	40	0	0	0	35.1	NA	NA	NA	Annex	Ornilux 2016-2018	Summer
1353	677	2018-06-28	2018	49	0	0	0	110.5	NA	NA	NA	ScienceComplex	FF 2016-2018	Summer
1354	677	2018-06-28	2018	49	0	0	0	35.1	NA	NA	NA	Annex	Ornilux 2016-2018	Summer
1355	678	2018-06-29	2018	40	0	0	0	110.5	NA	NA	NA	ScienceComplex	FF 2016-2018	Summer
1356	678	2018-06-29	2018	40	0	0	0	35.1	NA	NA	NA	Annex	Ornilux 2016-2018	Summer
1357	679	2018-07-03	2018	50	0	0	0	110.5	NA	NA	NA	ScienceComplex	FF 2016-2018	Summer
1358	679	2018-07-03	2018	50	0	0	0	35.1	NA	NA	NA	Annex	Ornilux 2016-2018	Summer
1359	680	2018-07-06	2018	47	0	0	0	110.5	NA	NA	NA	ScienceComplex	FF 2016-2018	Summer
1360	680	2018-07-06	2018	47	0	0	0	35.1	NA	NA	NA	Annex	Ornilux 2016-2018	Summer
1361	681	2018-07-09	2018	50	0	0	0	110.5	NA	NA	NA	ScienceComplex	FF 2016-2018	Summer
1362	681	2018-07-09	2018	50	0	0	0	35.1	NA	NA	NA	Annex	Ornilux 2016-2018	Summer
1363	682	2018-07-10	2018	3	0	0	0	110.5	NA	NA	NA	ScienceComplex	FF 2016-2018	Summer
1364	682	2018-07-10	2018	3	0	0	0	35.1	NA	NA	NA	Annex	Ornilux 2016-2018	Summer
1365	683	2018-07-11	2018	41	0	0	0	110.5	NA	NA	NA	ScienceComplex	FF 2016-2018	Summer
1366	683	2018-07-11	2018	41	0	0	0	35.1	NA	NA	NA	Annex	Ornilux 2016-2018	Summer
1367	684	2018-07-12	2018	4	0	0	0	110.5	NA	NA	NA	ScienceComplex	FF 2016-2018	Summer
1368	684	2018-07-12	2018	4	0	0	0	35.1	NA	NA	NA	Annex	Ornilux 2016-2018	Summer
1369	685	2018-07-13	2018	51	0	0	0	110.5	NA	NA	NA	ScienceComplex	FF 2016-2018	Summer
1370	685	2018-07-13	2018	51	0	0	0	35.1	NA	NA	NA	Annex	Ornilux 2016-2018	Summer
1371	686	2018-07-16	2018	28	0	0	0	110.5	NA	NA	NA	ScienceComplex	FF 2016-2018	Summer
1372	686	2018-07-16	2018	28	0	0	0	35.1	NA	NA	NA	Annex	Ornilux 2016-2018	Summer
1373	687	2018-07-17	2018	4	0	0	0	110.5	NA	NA	NA	ScienceComplex	FF 2016-2018	Summer
1374	687	2018-07-17	2018	4	0	0	0	35.1	NA	NA	NA	Annex	Ornilux 2016-2018	Summer
1375	688	2018-07-18	2018	3	0	0	0	110.5	NA	NA	NA	ScienceComplex	FF 2016-2018	Summer
1376	688	2018-07-18	2018	3	0	0	0	35.1	NA	NA	NA	Annex	Ornilux 2016-2018	Summer
1377	689	2018-07-20	2018	28	0	0	0	110.5	NA	NA	NA	ScienceComplex	FF 2016-2018	Summer
1378	689	2018-07-20	2018	28	0	0	0	35.1	NA	NA	NA	Annex	Ornilux 2016-2018	Summer
1379	690	2018-07-23	2018	40	0	0	0	110.5	NA	NA	NA	ScienceComplex	FF 2016-2018	Summer
1380	690	2018-07-23	2018	40	0	0	0	35.1	NA	NA	NA	Annex	Ornilux 2016-2018	Summer
1381	691	2018-07-24	2018	15	0	0	0	110.5	NA	NA	NA	ScienceComplex	FF 2016-2018	Summer
1382	691	2018-07-24	2018	15	0	0	0	35.1	NA	NA	NA	Annex	Ornilux 2016-2018	Summer
1383	692	2018-07-25	2018	31	0	0	0	110.5	NA	NA	NA	ScienceComplex	FF 2016-2018	Summer
1384	692	2018-07-25	2018	31	0	0	0	35.1	NA	NA	NA	Annex	Ornilux 2016-2018	Summer
1385	693	2018-07-26	2018	4	0	0	0	110.5	NA	NA	NA	ScienceComplex	FF 2016-2018	Summer
1386	693	2018-07-26	2018	4	0	0	0	35.1	NA	NA	NA	Annex	Ornilux 2016-2018	Summer
1387	694	2018-07-27	2018	3	0	0	0	110.5	NA	NA	NA	ScienceComplex	FF 2016-2018	Summer
1388	694	2018-07-27	2018	3	0	0	0	35.1	NA	NA	NA	Annex	Ornilux 2016-2018	Summer
1389	695	2018-07-30	2018	28	0	0	0	110.5	NA	NA	NA	ScienceComplex	FF 2016-2018	Summer
1390	695	2018-07-30	2018	28	0	0	0	35.1	NA	NA	NA	Annex	Ornilux 2016-2018	Summer
1391	696	2018-07-31	2018	50	0	0	0	110.5	NA	NA	NA	ScienceComplex	FF 2016-2018	Summer
1392	696	2018-07-31	2018	50	0	0	0	35.1	NA	NA	NA	Annex	Ornilux 2016-2018	Summer
1393	697	2018-08-07	2018	3	0	0	0	110.5	NA	NA	NA	ScienceComplex	FF 2016-2018	Summer
1394	697	2018-08-07	2018	3	0	0	0	35.1	NA	NA	NA	Annex	Ornilux 2016-2018	Summer
1395	698	2018-08-09	2018	4	0	0	0	110.5	NA	NA	NA	ScienceComplex	FF 2016-2018	Summer
1396	698	2018-08-09	2018	4	0	0	0	35.1	NA	NA	NA	Annex	Ornilux 2016-2018	Summer
1397	699	2018-08-10	2018	28	0	0	0	110.5	NA	NA	NA	ScienceComplex	FF 2016-2018	Summer
1398	699	2018-08-10	2018	28	0	0	0	35.1	NA	NA	NA	Annex	Ornilux 2016-2018	Summer
1399	700	2018-08-13	2018	52	0	0	0	110.5	NA	NA	NA	ScienceComplex	FF 2016-2018	Summer
1400	700	2018-08-13	2018	52	0	0	0	35.1	NA	NA	NA	Annex	Ornilux 2016-2018	Summer
1401	701	2018-08-14	2018	48	0	0	0	110.5	NA	NA	NA	ScienceComplex	FF 2016-2018	Summer
1402	701	2018-08-14	2018	48	0	0	0	35.1	NA	NA	NA	Annex	Ornilux 2016-2018	Summer
1403	702	2018-08-15	2018	52	0	0	0	110.5	NA	NA	NA	ScienceComplex	FF 2016-2018	Summer
1404	702	2018-08-15	2018	52	0	0	0	35.1	NA	NA	NA	Annex	Ornilux 2016-2018	Summer
1405	703	2018-08-16	2018	4	0	0	0	110.5	NA	NA	NA	ScienceComplex	FF 2016-2018	Summer
1406	703	2018-08-16	2018	4	0	0	0	35.1	NA	NA	NA	Annex	Ornilux 2016-2018	Summer
1407	704	2018-08-17	2018	52	0	0	0	110.5	NA	NA	NA	ScienceComplex	FF 2016-2018	Summer
1408	704	2018-08-17	2018	52	0	0	0	35.1	NA	NA	NA	Annex	Ornilux 2016-2018	Summer
1409	705	2018-08-20	2018	52	0	0	0	110.5	NA	NA	NA	ScienceComplex	FF 2016-2018	Summer
1410	705	2018-08-20	2018	52	0	0	0	35.1	NA	NA	NA	Annex	Ornilux 2016-2018	Summer
1411	706	2018-08-21	2018	3	0	0	0	110.5	NA	NA	NA	ScienceComplex	FF 2016-2018	Summer
1412	706	2018-08-21	2018	3	0	0	0	35.1	NA	NA	NA	Annex	Ornilux 2016-2018	Summer
1413	707	2018-08-22	2018	52	0	0	0	110.5	NA	NA	NA	ScienceComplex	FF 2016-2018	Summer
1414	707	2018-08-22	2018	52	0	0	0	35.1	NA	NA	NA	Annex	Ornilux 2016-2018	Summer
1415	708	2018-08-23	2018	52	0	0	0	110.5	NA	NA	NA	ScienceComplex	FF 2016-2018	Summer
1416	708	2018-08-23	2018	52	0	0	0	35.1	NA	NA	NA	Annex	Ornilux 2016-2018	Summer
1417	709	2018-08-24	2018	52	0	0	0	110.5	NA	NA	NA	ScienceComplex	FF 2016-2018	Summer
1418	709	2018-08-24	2018	52	0	0	0	35.1	NA	NA	NA	Annex	Ornilux 2016-2018	Summer
1419	710	2018-08-27	2018	53	0	0	0	110.5	NA	NA	NA	ScienceComplex	FF 2016-2018	Summer
1420	710	2018-08-27	2018	53	0	0	0	35.1	NA	NA	NA	Annex	Ornilux 2016-2018	Summer
1421	711	2018-08-28	2018	41	0	0	0	110.5	NA	NA	NA	ScienceComplex	FF 2016-2018	Summer
1422	711	2018-08-28	2018	41	0	0	0	35.1	NA	NA	NA	Annex	Ornilux 2016-2018	Summer
1423	712	2018-08-29	2018	53	0	0	0	110.5	NA	NA	NA	ScienceComplex	FF 2016-2018	Summer
1424	712	2018-08-29	2018	53	0	0	0	35.1	NA	NA	NA	Annex	Ornilux 2016-2018	Summer
1425	713	2018-08-30	2018	28	0	0	0	110.5	NA	NA	NA	ScienceComplex	FF 2016-2018	Summer
1426	713	2018-08-30	2018	28	0	0	0	35.1	NA	NA	NA	Annex	Ornilux 2016-2018	Summer
1427	714	2018-08-31	2018	28	0	0	0	110.5	NA	NA	NA	ScienceComplex	FF 2016-2018	Summer
1428	714	2018-08-31	2018	28	0	0	0	35.1	NA	NA	NA	Annex	Ornilux 2016-2018	Summer
1429	715	2018-09-04	2018	53	0	0	0	110.5	NA	NA	NA	ScienceComplex	FF 2016-2018	Fall
1430	715	2018-09-04	2018	53	0	0	0	35.1	NA	NA	NA	Annex	Ornilux 2016-2018	Fall
1431	716	2018-09-06	2018	3	0	0	0	110.5	NA	NA	NA	ScienceComplex	FF 2016-2018	Fall
1432	716	2018-09-06	2018	3	0	0	0	35.1	NA	NA	NA	Annex	Ornilux 2016-2018	Fall
1433	717	2018-09-07	2018	28	0	0	0	110.5	NA	NA	NA	ScienceComplex	FF 2016-2018	Fall
1434	717	2018-09-07	2018	28	0	0	0	35.1	NA	NA	NA	Annex	Ornilux 2016-2018	Fall
1435	718	2018-09-10	2018	53	0	0	0	110.5	NA	NA	NA	ScienceComplex	FF 2016-2018	Fall
1436	718	2018-09-10	2018	53	0	0	0	35.1	NA	NA	NA	Annex	Ornilux 2016-2018	Fall
1437	719	2018-09-11	2018	3	0	0	0	110.5	NA	NA	NA	ScienceComplex	FF 2016-2018	Fall
1438	719	2018-09-11	2018	3	0	0	0	35.1	NA	NA	NA	Annex	Ornilux 2016-2018	Fall
1439	720	2018-09-12	2018	3	0	0	0	110.5	NA	NA	NA	ScienceComplex	FF 2016-2018	Fall
1440	720	2018-09-12	2018	3	0	0	0	35.1	NA	NA	NA	Annex	Ornilux 2016-2018	Fall
1441	721	2018-09-13	2018	40	0	0	0	110.5	NA	NA	NA	ScienceComplex	FF 2016-2018	Fall
1442	721	2018-09-13	2018	40	0	0	0	35.1	NA	NA	NA	Annex	Ornilux 2016-2018	Fall
1443	722	2018-09-14	2018	28	0	0	0	110.5	NA	NA	NA	ScienceComplex	FF 2016-2018	Fall
1444	722	2018-09-14	2018	28	0	0	0	35.1	NA	NA	NA	Annex	Ornilux 2016-2018	Fall
1445	723	2018-09-19	2018	3	0	0	0	110.5	NA	NA	NA	ScienceComplex	FF 2016-2018	Fall
1446	723	2018-09-19	2018	3	0	0	0	35.1	NA	NA	NA	Annex	Ornilux 2016-2018	Fall
1447	724	2018-09-20	2018	4	0	0	0	110.5	NA	NA	NA	ScienceComplex	FF 2016-2018	Fall
1448	724	2018-09-20	2018	4	0	0	0	35.1	NA	NA	NA	Annex	Ornilux 2016-2018	Fall
1449	725	2018-09-21	2018	40	0	0	0	110.5	NA	NA	NA	ScienceComplex	FF 2016-2018	Fall
1450	725	2018-09-21	2018	40	0	0	0	35.1	NA	NA	NA	Annex	Ornilux 2016-2018	Fall
1451	726	2018-09-25	2018	41	0	0	0	110.5	NA	NA	NA	ScienceComplex	FF 2016-2018	Fall
1452	726	2018-09-25	2018	41	0	0	0	35.1	NA	NA	NA	Annex	Ornilux 2016-2018	Fall

## Sheet: R Code
#### Libraries needed for data filtering and conversion ####
library(tidyverse)
### Libraries needed for plotting
library(sjPlot)
library(sjlabelled)
library(sjmisc)
#### Libraries needed for data analysis ###
library(lme4)
#### Load converted data for analysis ####
data<-read.csv("ms.data.csv")
#### GLMM - Poisson-distributed error - offset - window.area #####
m1<-glmer(coll.count ~ season + (1|year) + (1|obsID), family=poisson, data = data, offset=log(window.area),control=glmerControl(optimizer="bobyqa",optCtrl=list(maxfun=2e5))) #
m2<-glmer(coll.count ~ building + season + (1|year) + (1|obsID), family=poisson, data = data,offset=log(window.area),control=glmerControl(optimizer="bobyqa",optCtrl=list(maxfun=2e5)))
m3 <-glmer(coll.count ~ treat.grp + season + (1|year) + (1|obsID), family=poisson, data = data, offset=log(window.area),control=glmerControl(optimizer="bobyqa",optCtrl=list(maxfun=2e5)))
m0<-glmer(coll.count ~ (1|year) + (1|obsID), family=poisson, data = data, offset=log(window.area),control=glmerControl(optimizer="bobyqa",optCtrl=list(maxfun=2e5)))
AIC(m1,m2,m3,m0)
set_theme(geom.outline.size = 1,
geom.label.size = 2,
title.size = 1.5,
panel.major.gridcol = "black",
panel.major.linetype = 3,
panel.minor.linetype = 1,
panel.gridcol.y = "white",
plot.margins =unit(c(0.25,0.25,1,0.25),"cm"),
base = theme_bw(),
axis.tickslen = 0.3,
axis.title.size = 1.75,
axis.textsize = 1.25,
axis.title.x.vjust =-1.5,
)
sjPlot::plot_model(m3,
title=" ",
rm.terms = c("season [Spring]","season [Summer]","season [Winter]"),
axis.lim = c(0.01,1.01),
axis.labels = c("ORNILUX 2016-2018","ORNILUX 2013-2015","Feather Friendly 2016-2018"),
grid = TRUE,
wrap.labels = 50,
colors = "bw",
)
